# Supplementary material for: AIE-active cyclometalated iridium(iii) complexes for highly efficient picric acid detection in aqueous media
Source: Royal Society of Chemistry journal article supplement (doi:10.1039/d3qi02291a), 2024-01-01
Supplement: d3qi02291a1.pdf [file d3qi02291a1.pdf]

**Electronic Supplementary Information (ESI)**  
*for*  
**AIE-active cyclometalated iridium(III) complexes**  
**for the highly efficient picric acid detection in**  
**aqueous media**

*Monosh Rabha, Deikrisha Lyngdoh Lyngkhoi, Sumit Kumar Patra, and Snehadrinarayan*

*Khatua\**

Department of Chemistry, North-Eastern Hill University, Shillong, Meghalaya 793022, India

\*Email: [snehadri@gmail.com](mailto:snehadri@gmail.com); [skhatua@nehu.ac.in](mailto:skhatua@nehu.ac.in)

## Table of Contents

|     |                                                                                                                                                   | Page No. |
|-----|---------------------------------------------------------------------------------------------------------------------------------------------------|----------|
| 1.  | List of compounds and Synthetic Schemes                                                                                                           | S2       |
| 2.  | NMR spectra of Ligand <b>L</b>                                                                                                                    | S3       |
| 3.  | HRMS spectra of Ligand <b>L</b>                                                                                                                   | S4       |
| 4.  | NMR spectra of <b>1[PF<sub>6</sub>]</b>                                                                                                           | S4-S5    |
| 5.  | HRMS spectra of <b>1[PF<sub>6</sub>]</b>                                                                                                          | S6       |
| 6.  | NMR spectra of <b>2[PF<sub>6</sub>]</b>                                                                                                           | S6-7     |
| 7.  | HRMS spectra of <b>2[PF<sub>6</sub>]</b>                                                                                                          | S8       |
| 8.  | NMR spectra of <b>3[PF<sub>6</sub>]</b>                                                                                                           | S8-S9    |
| 9.  | ESI-HRMS spectra of <b>3[PF<sub>6</sub>]</b>                                                                                                      | S10      |
| 10. | Cyclic voltammogram of [Ir(ppy) <sub>2</sub> (phen)](PF <sub>6</sub> )                                                                            | S10      |
| 11. | UV-vis and PL spectra of compounds and <b>L</b> with water                                                                                        | S11-S12  |
| 12. | Picric acid detection in UV-vis spectroscopy                                                                                                      | S13-S15  |
| 13. | Crystal data and selected bond lengths and angles of complexes <b>1[PF<sub>6</sub>]</b> , <b>2[PF<sub>6</sub>]</b> , and <b>3[PF<sub>6</sub>]</b> | S16-S21  |
| 14. | Detection limit, quantum yield, electrochemistry, TCSPC and computational studies                                                                 | S22-S30  |
| 15. | Cartesian coordinates of the complexes <b>1</b> , <b>2</b> and <b>3</b>                                                                           | S31-S33  |
| 16. | References                                                                                                                                        | S34      |

**Chart S1.** Synthetic schemes and list of compounds.

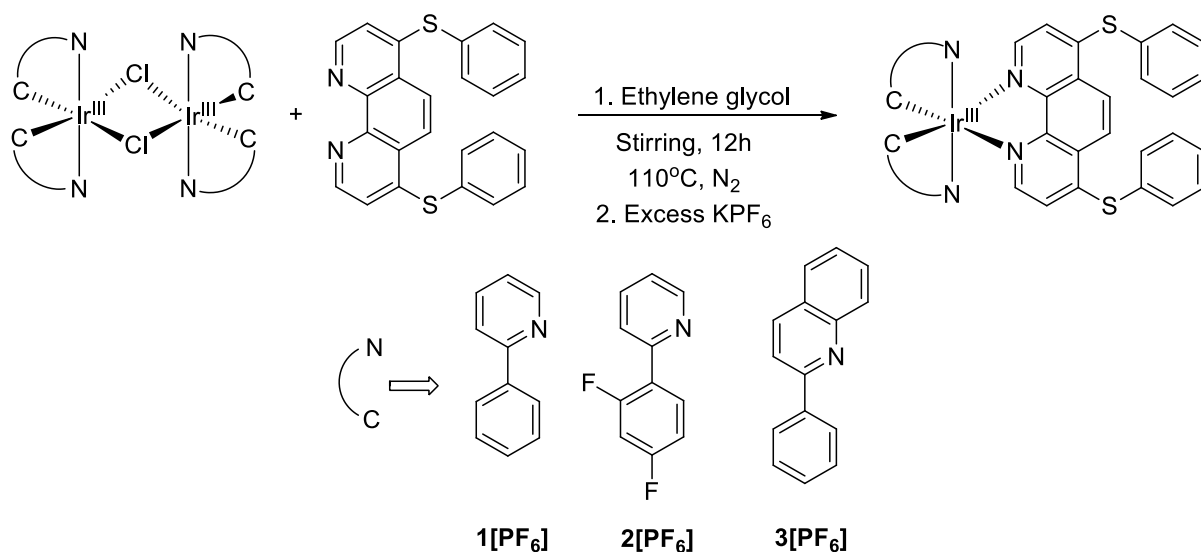

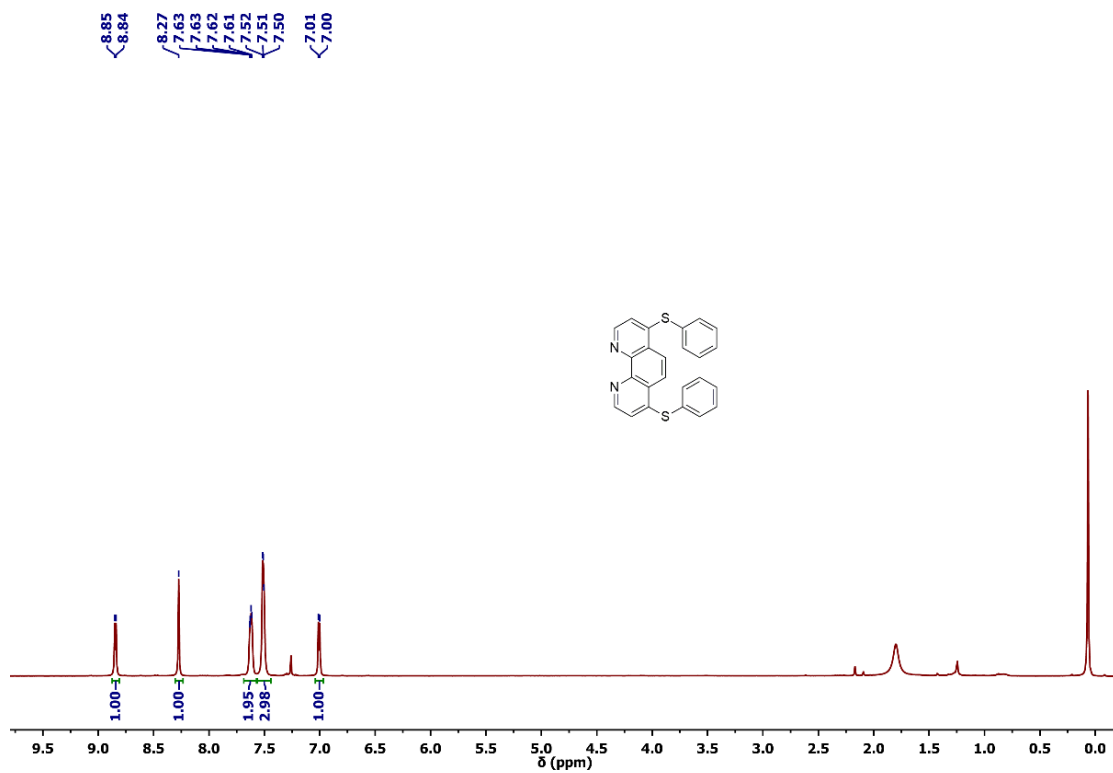

**Fig. S1.**  $^1\text{H}$  NMR spectrum of **L** in  $\text{CDCl}_3$ .

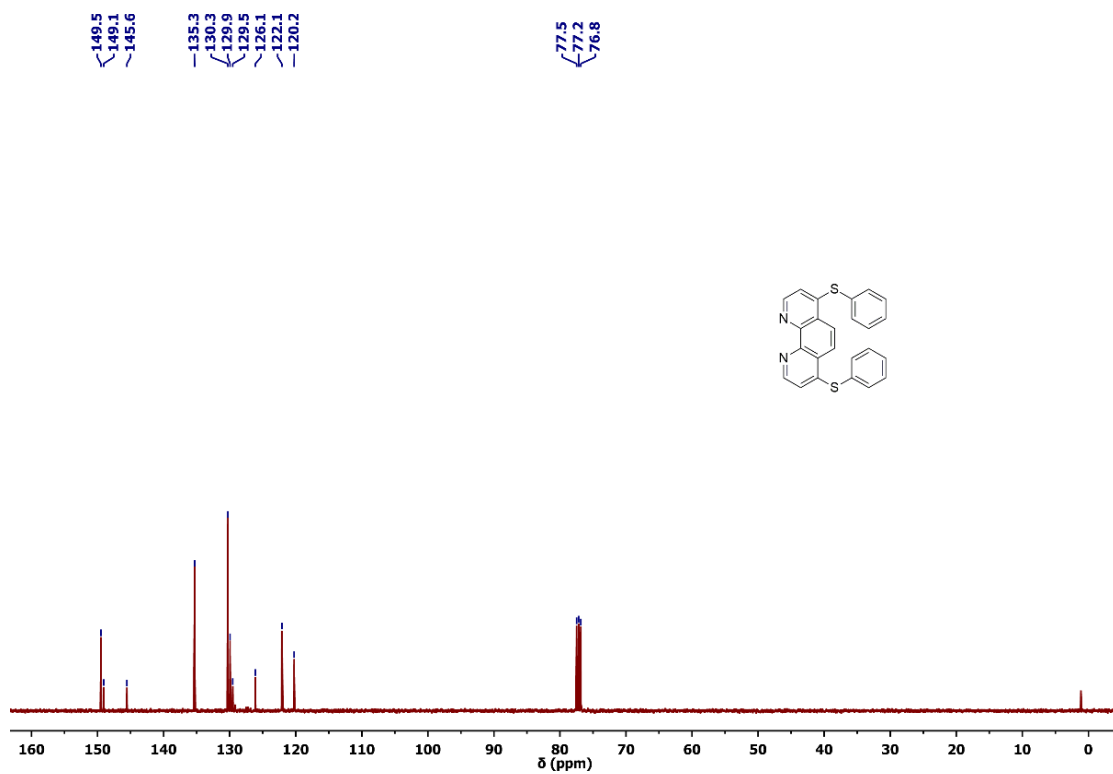

**Fig. S2.**  $^{13}\text{C}$  NMR spectrum of **L** in  $\text{CDCl}_3$ .

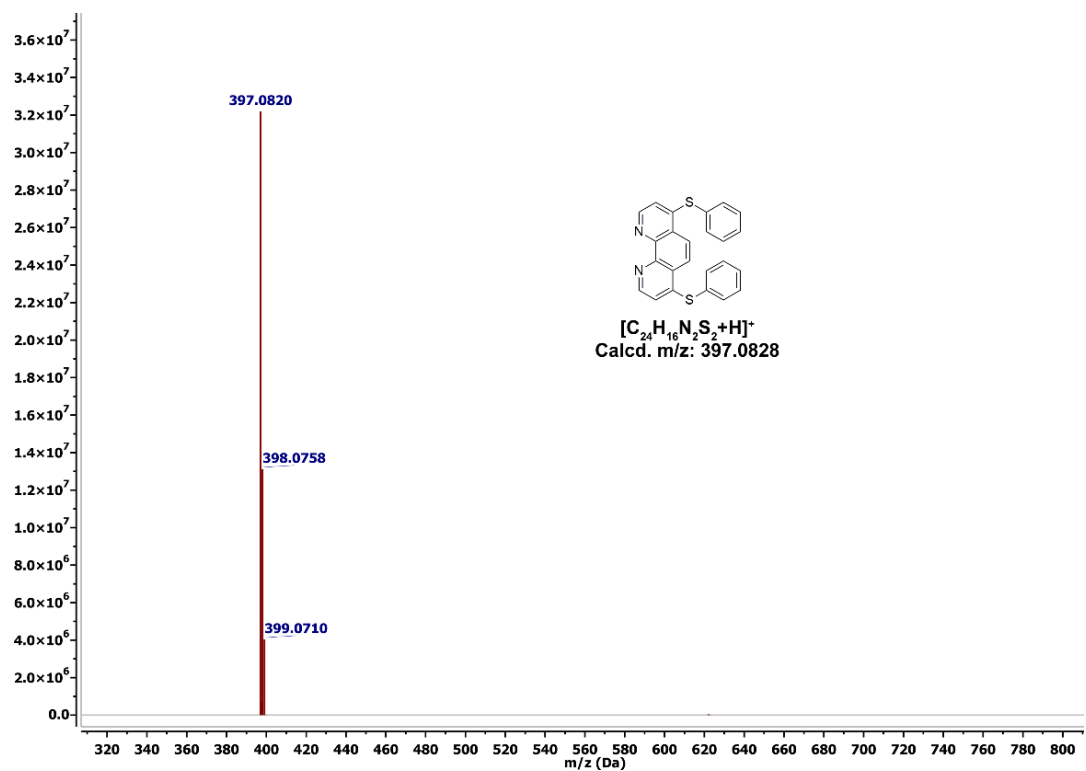

Fig. S3. HRMS spectrum of **L** in methanol.

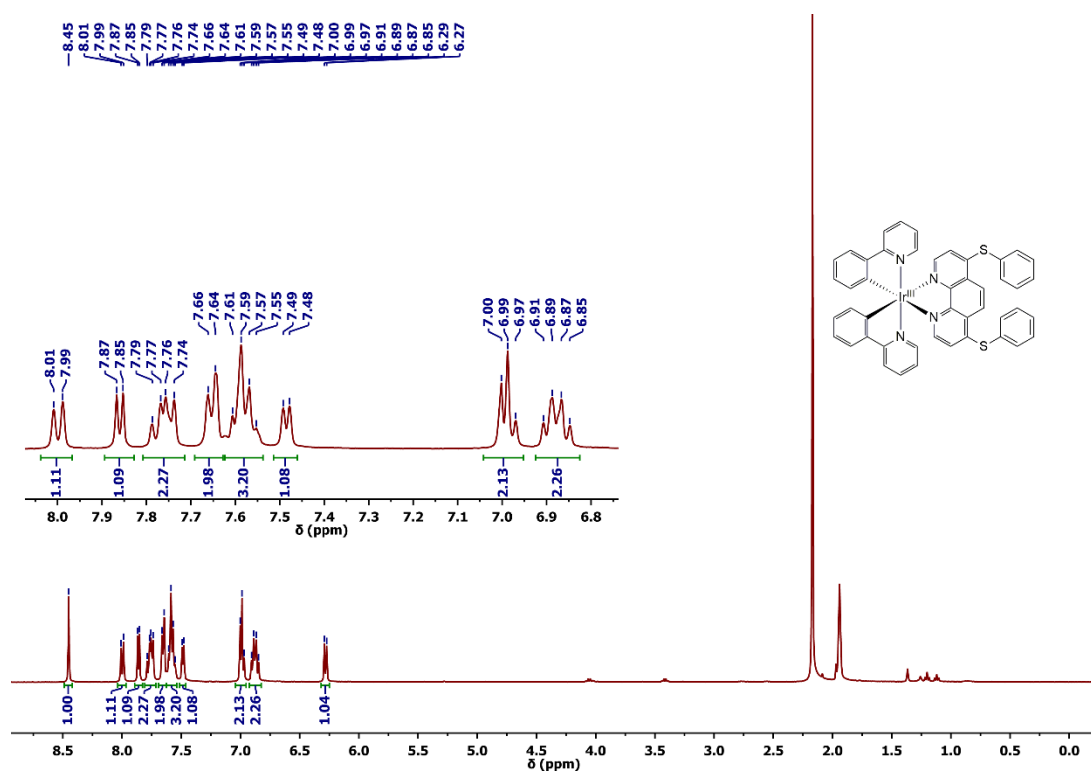

Fig. S4.  $^1H$  NMR spectrum of **1** $[PF_6]$  in  $CD_3CN$ .

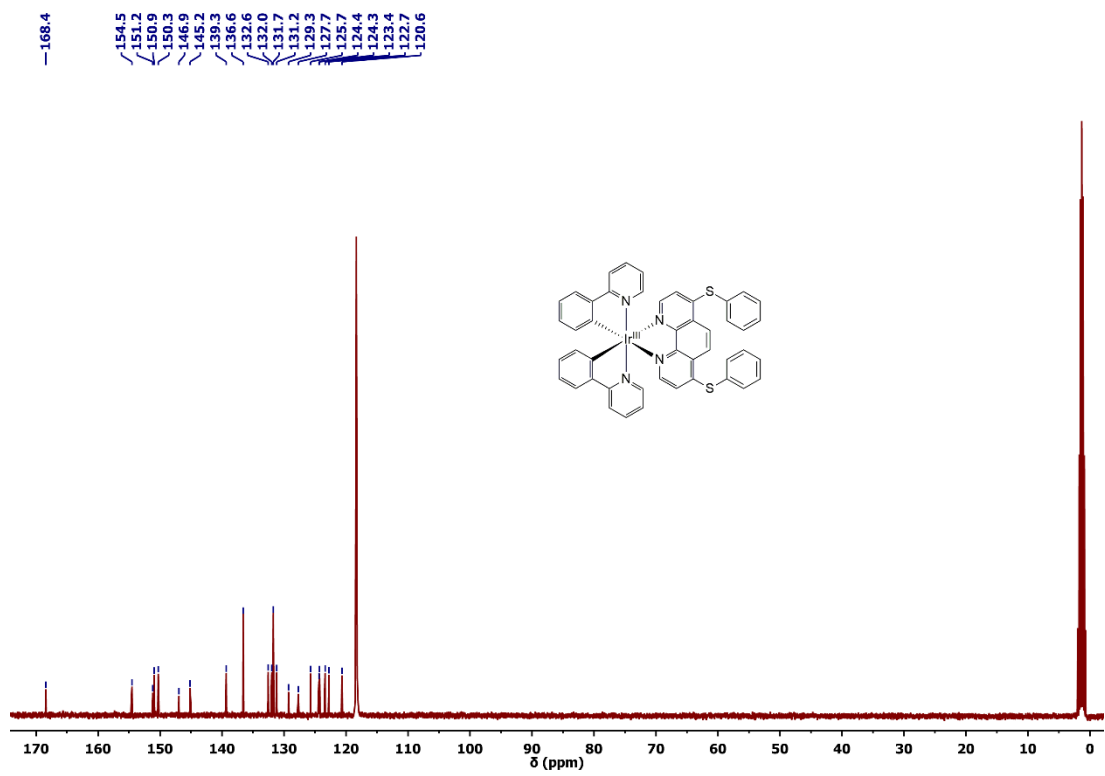

Fig. S5.  $^{13}\text{C}$  NMR spectrum of **1**[PF<sub>6</sub>] in CD<sub>3</sub>CN.

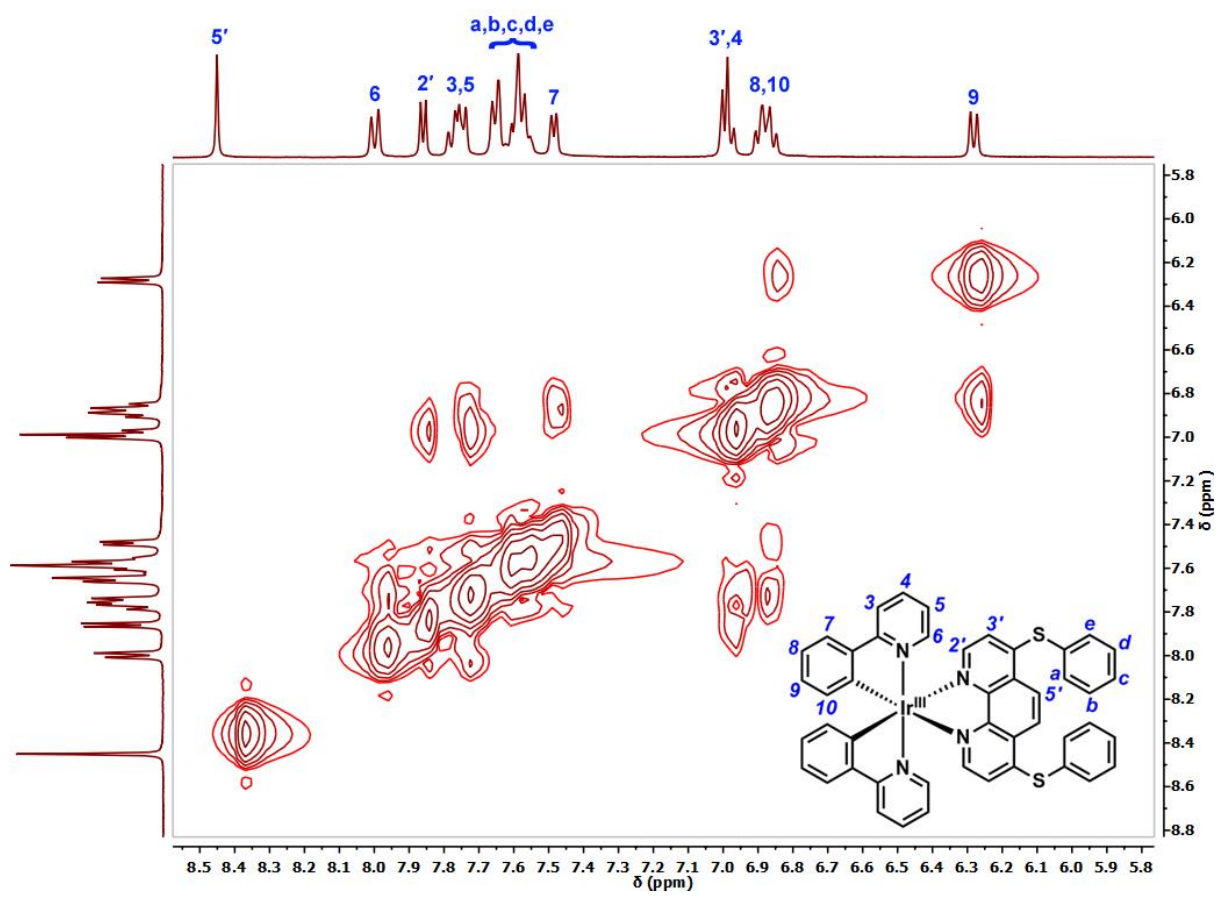

Fig. S6. Partial  $^1\text{H}$ - $^1\text{H}$  COSY NMR spectrum of **1**[PF<sub>6</sub>] in CD<sub>3</sub>CN.

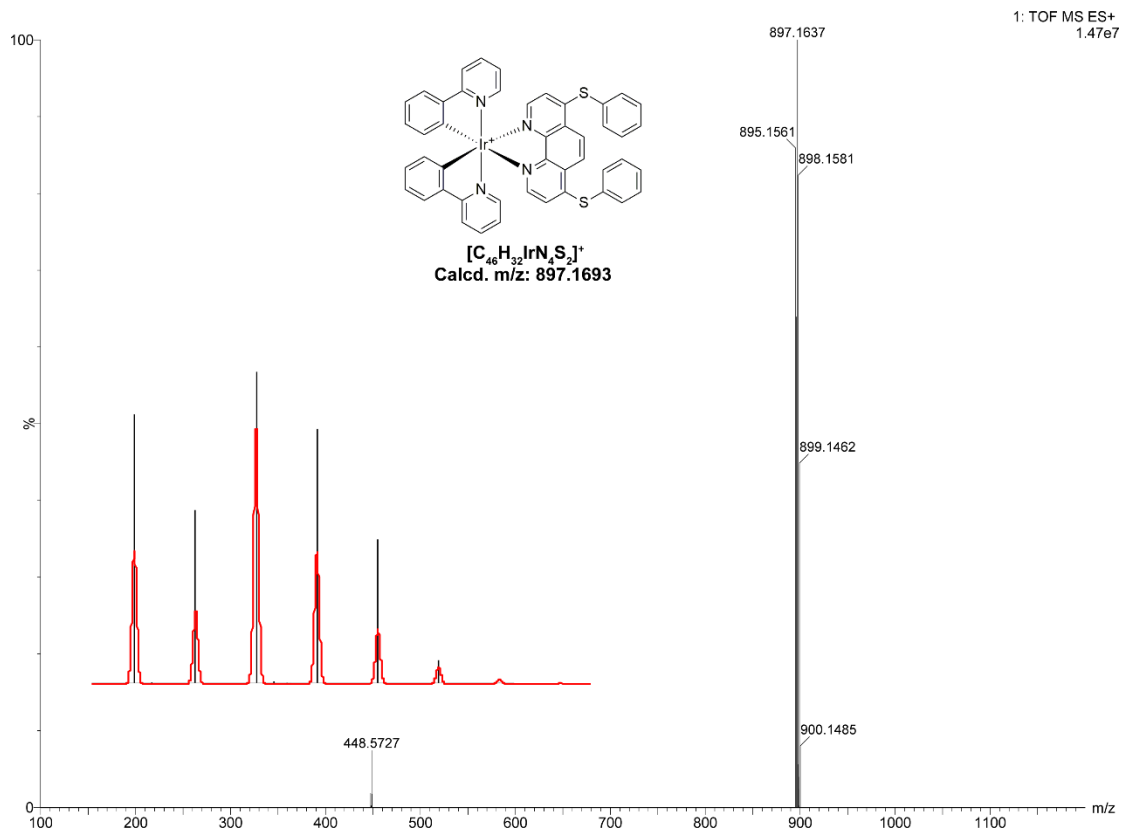

**Fig. S7.** HRMS spectrum of **1**[PF<sub>6</sub>] in CH<sub>3</sub>CN. *inset:* isotopic distribution of mass spectrum of **1**[PF<sub>6</sub>] of experimentally obtained (black line), simulated (red line).

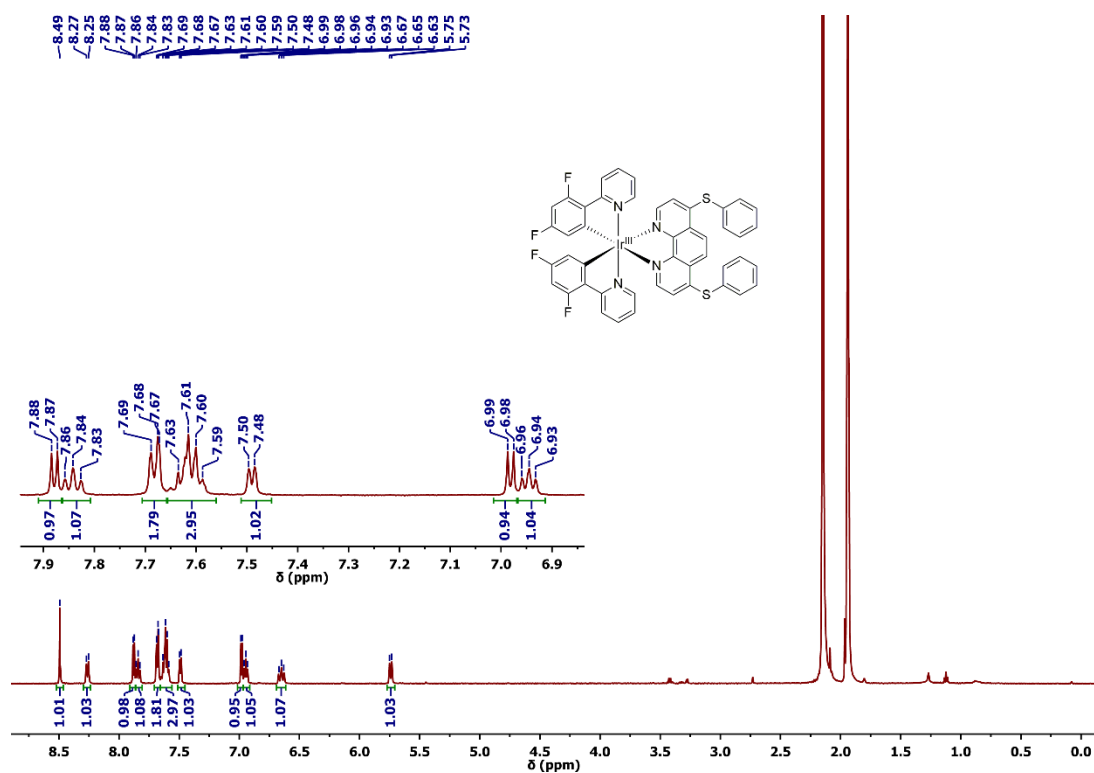

**Fig. S8.** <sup>1</sup>H NMR spectrum of **2**[PF<sub>6</sub>] in CD<sub>3</sub>CN.

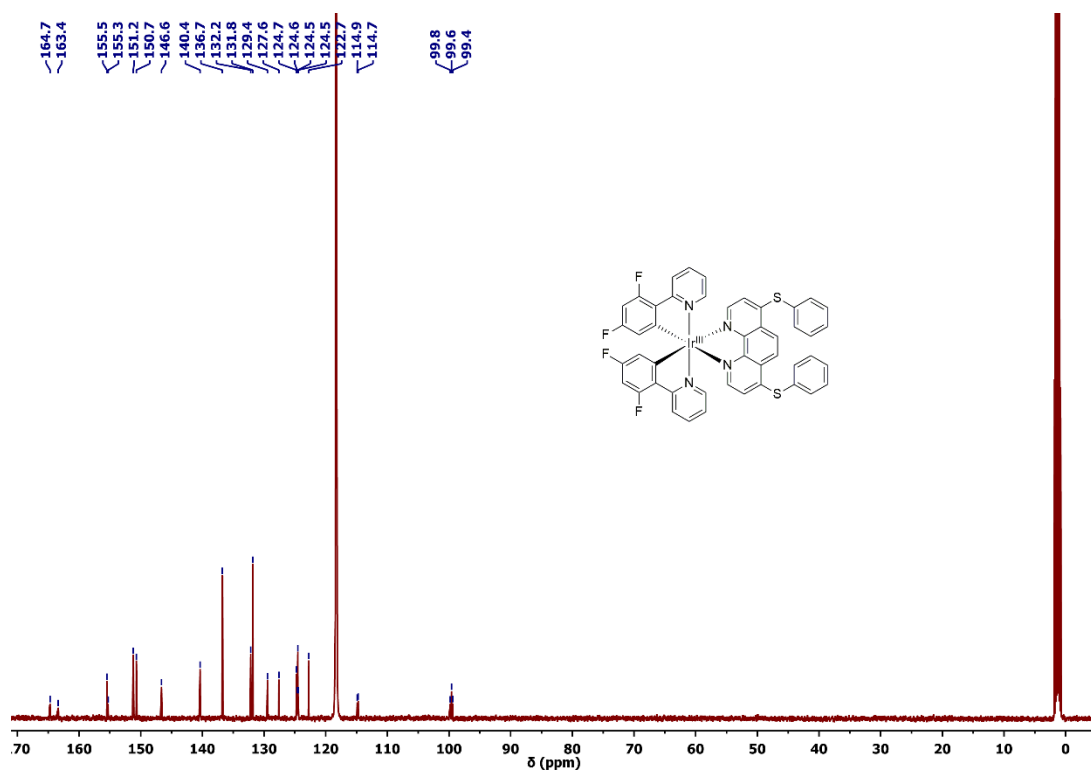

**Fig. S9.**  $^{13}\text{C}$  NMR spectrum of **2** [ $\text{PF}_6$ ] in  $\text{CD}_3\text{CN}$ .

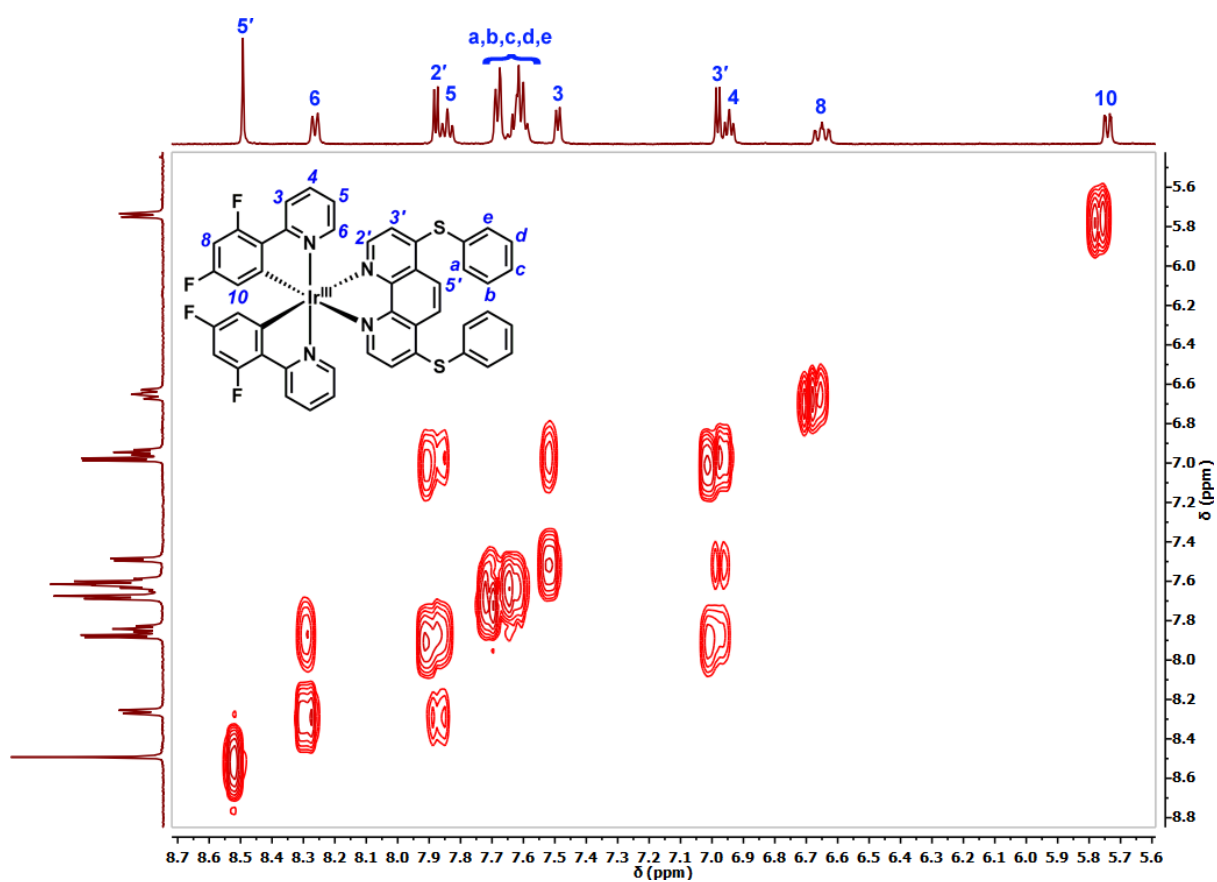

**Fig. S10.** Partial  $^1\text{H}$ - $^1\text{HCOASY}$  NMR spectrum of **2** [ $\text{PF}_6$ ] in  $\text{CD}_3\text{CN}$ .

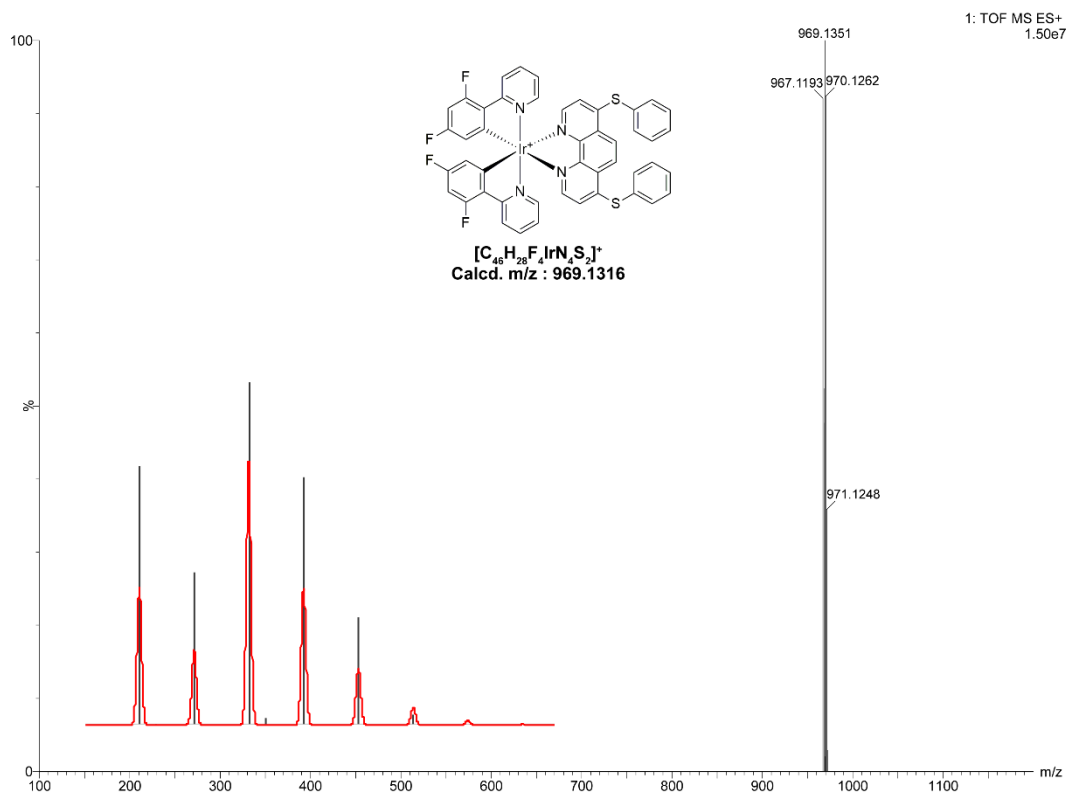

**Fig. S11.** HRMS spectrum of **2**[PF<sub>6</sub>] in CH<sub>3</sub>CN. *Inset:* isotopic distribution of mass spectrum of **2**[PF<sub>6</sub>] of experimentally obtained (black line), simulated (red line).

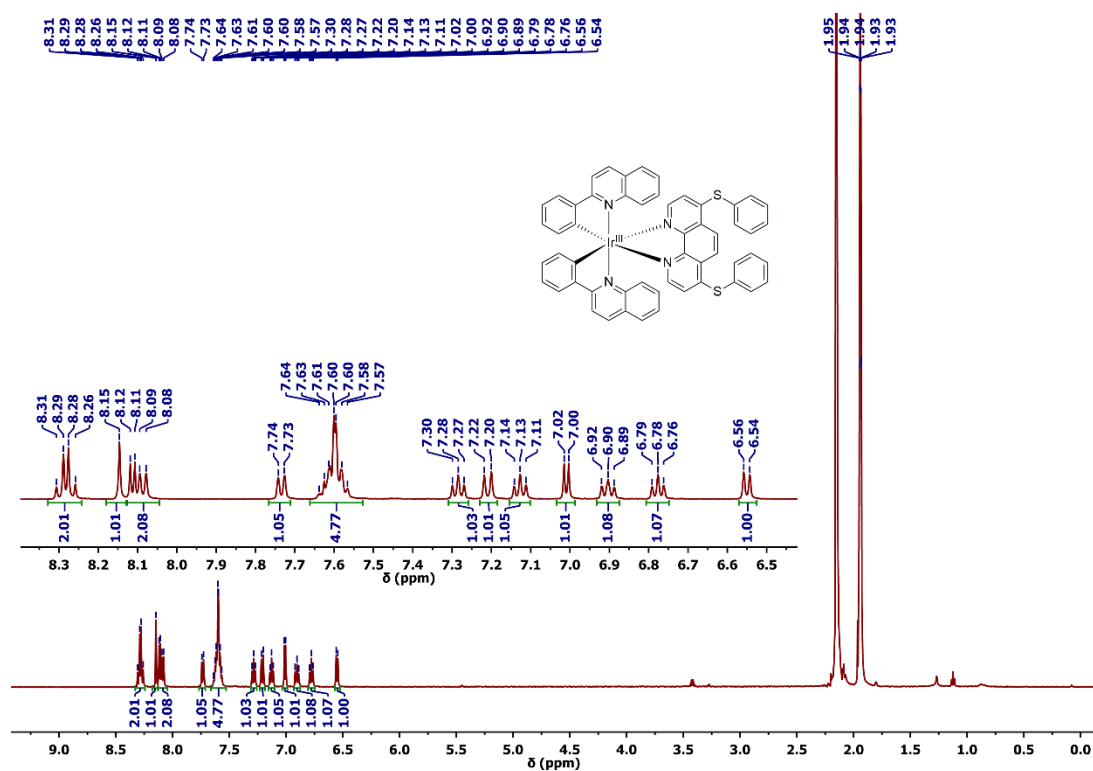

**Fig. S12.** <sup>1</sup>H NMR spectrum of **3**[PF<sub>6</sub>] in CD<sub>3</sub>CN.



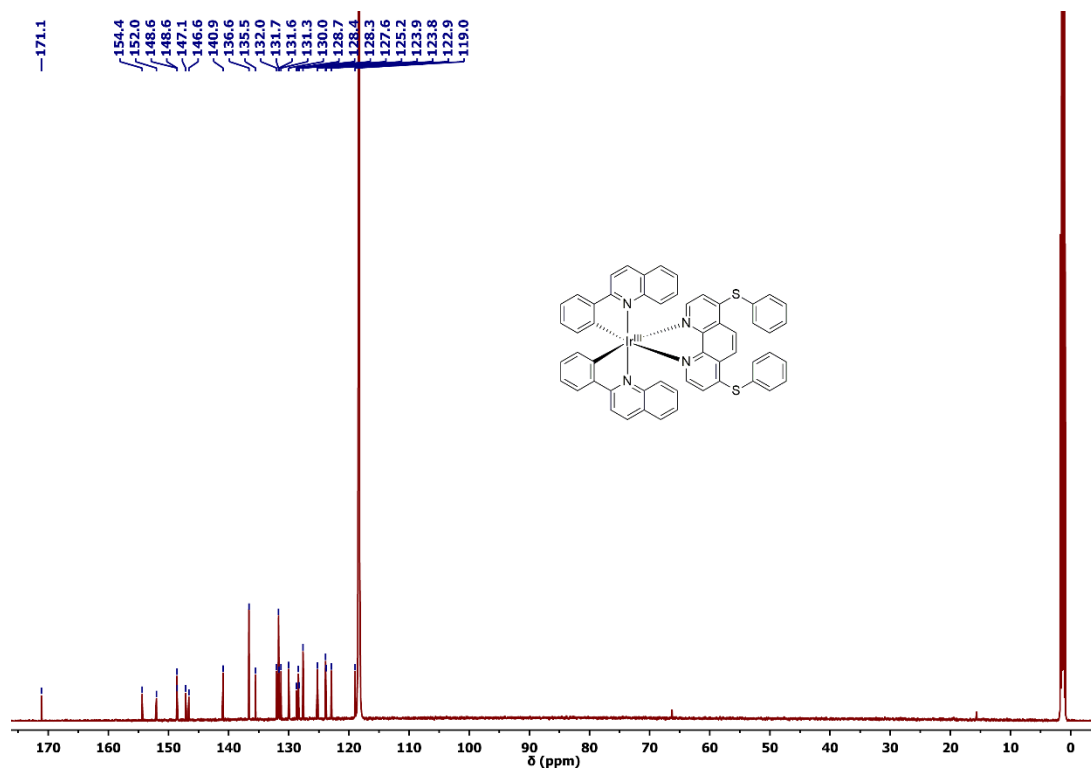

**Fig. S13.**  $^{13}\text{C}$  NMR spectrum of **3**[PF<sub>6</sub>] in CD<sub>3</sub>CN.

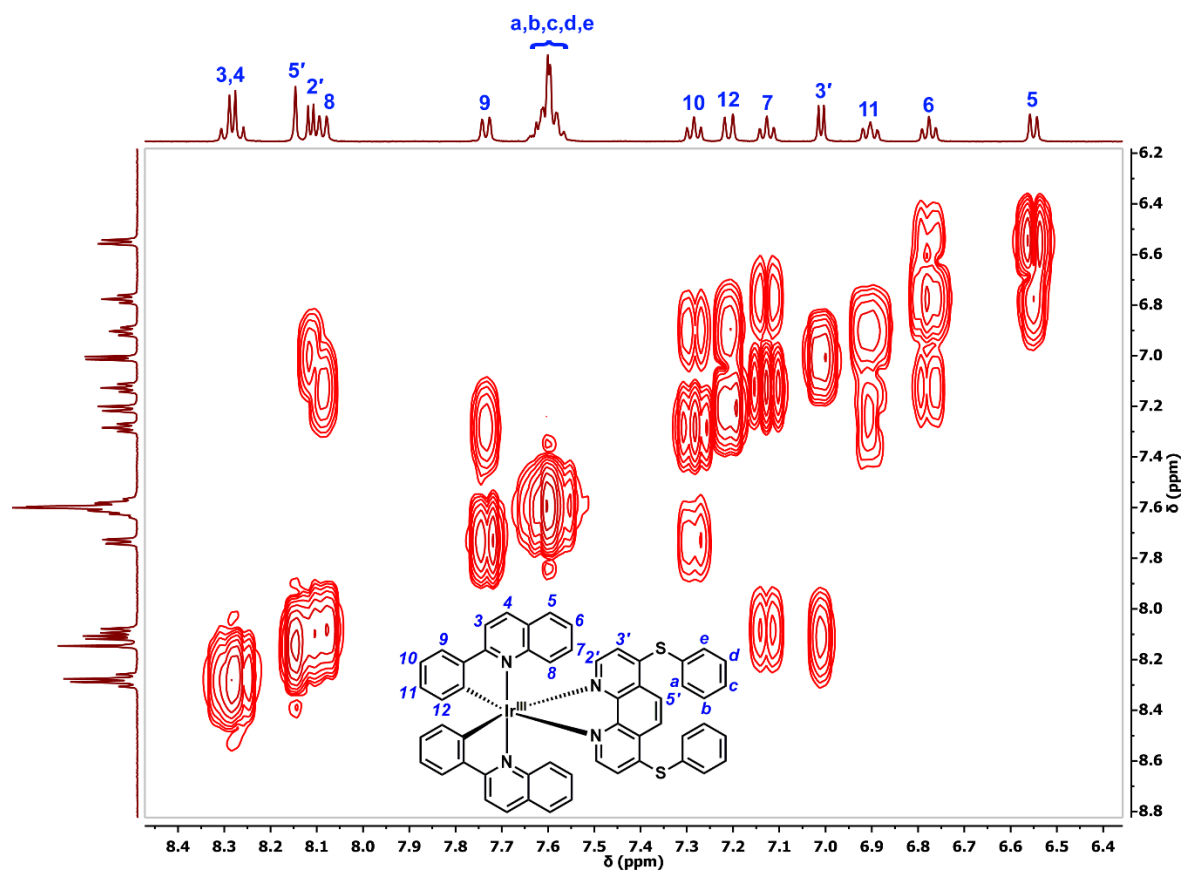

**Fig. S14.** Partial  $^1\text{H}$ - $^1\text{H}$ COSY NMR spectrum of **3**[PF<sub>6</sub>] in CD<sub>3</sub>CN.

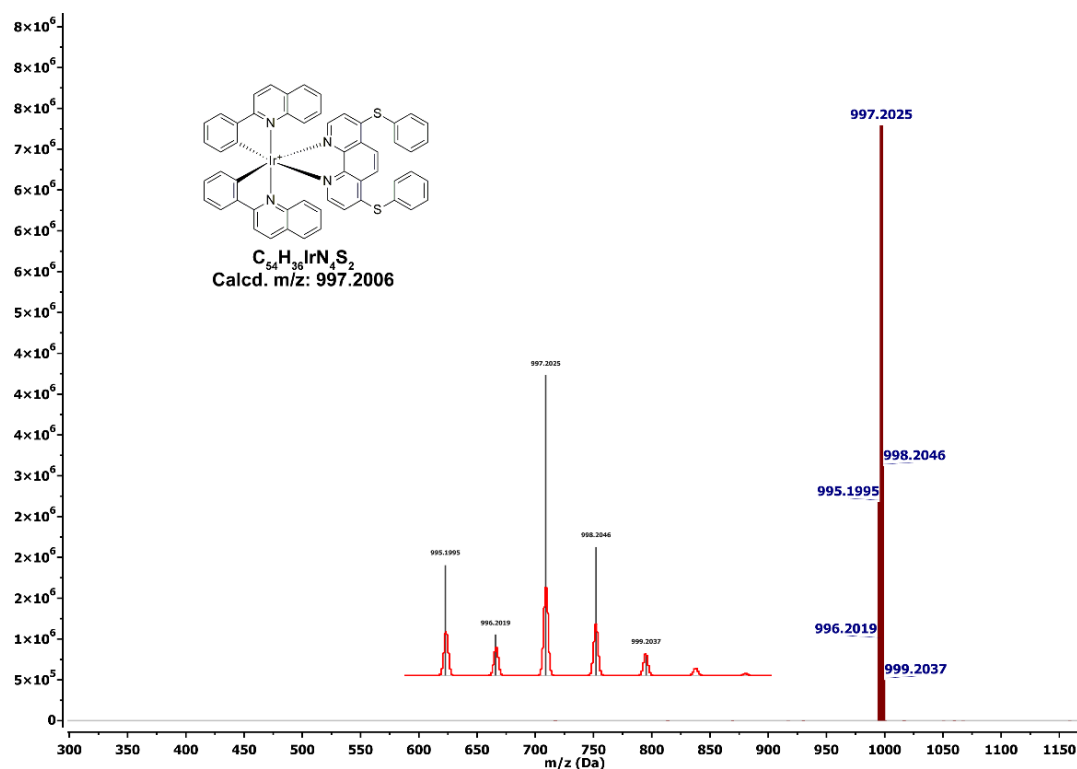

**Fig. S15.** HRMS spectrum of **3**[PF<sub>6</sub>] in CH<sub>3</sub>CN. *Inset:* isotopic distribution of mass spectrum of **3**[PF<sub>6</sub>] of experimentally obtained (black line), simulated (red line).

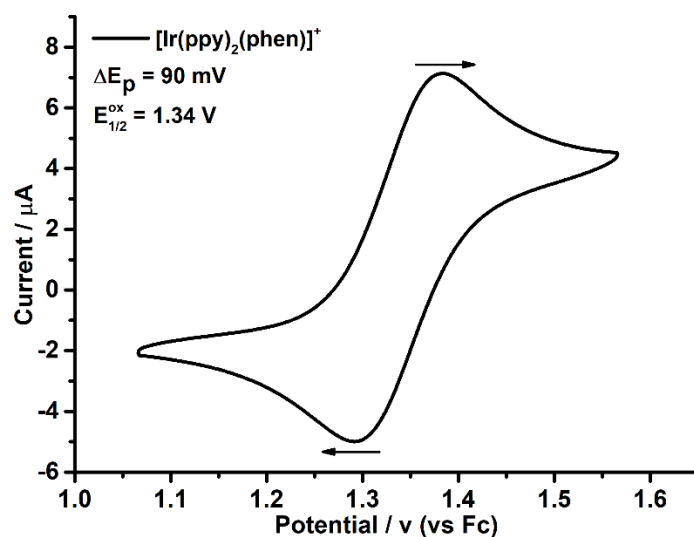

**Fig. S16.** Cyclic voltammogram of [Ir(ppy)<sub>2</sub>(phen)](PF<sub>6</sub>), with 0.1 M Bu<sub>4</sub>NClO<sub>4</sub> in dry and degassed CH<sub>3</sub>CN versus the Fc/Fc<sup>+</sup> couple.

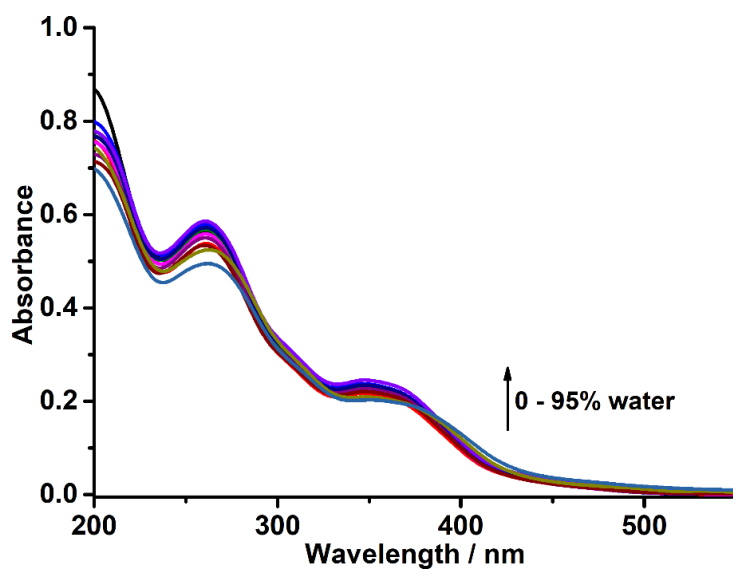

**Fig. S17.** UV-vis spectra of 1[PF<sub>6</sub>] in CH<sub>3</sub>CN with different water (0-95%).

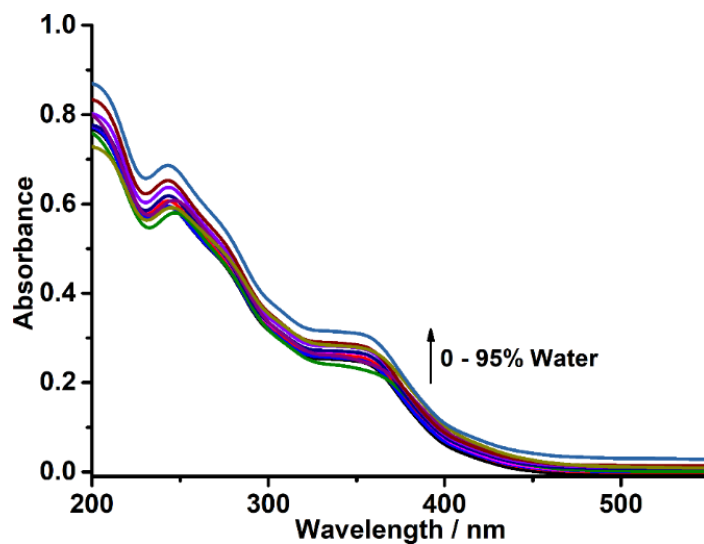

**Fig. S18.** UV-vis spectra of 2[PF<sub>6</sub>] in CH<sub>3</sub>CN with different water (0-95%).

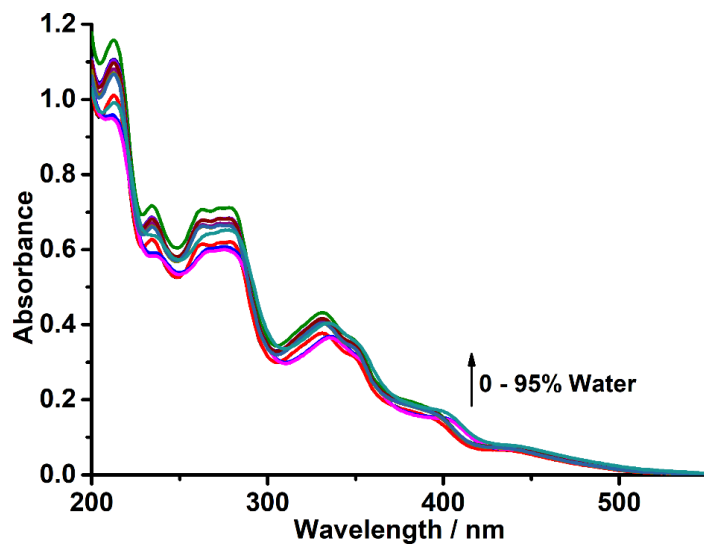

**Fig. S19.** UV-vis spectra of 3[PF<sub>6</sub>] in CH<sub>3</sub>CN with different water (0-95%).

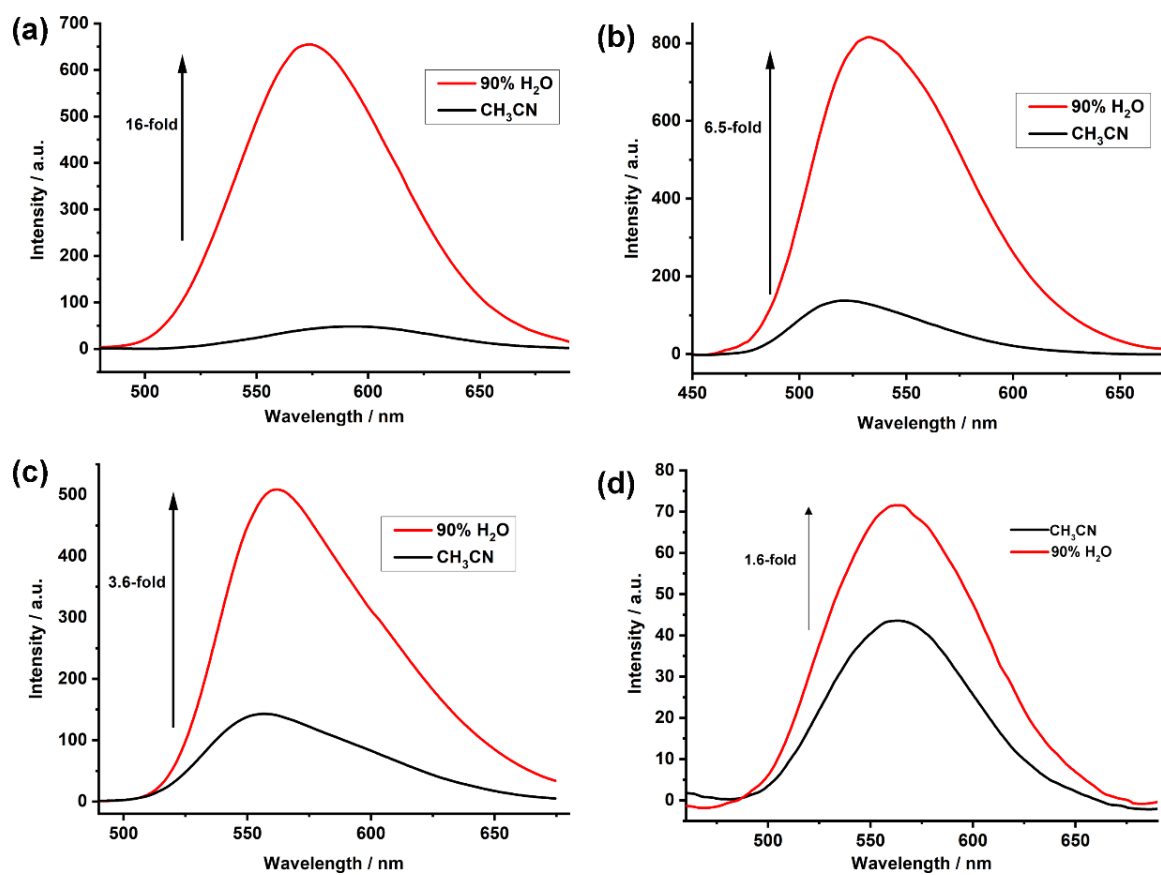

**Fig. S20.** PL spectra of compound (a) **1** (b) **2** (c) **3** and (d)  $[\text{Ir}(\text{ppy})_2(\text{phen})]\text{PF}_6$  in  $\text{CH}_3\text{CN}$  and 90% water- $\text{CH}_3\text{CN}$  mixture.

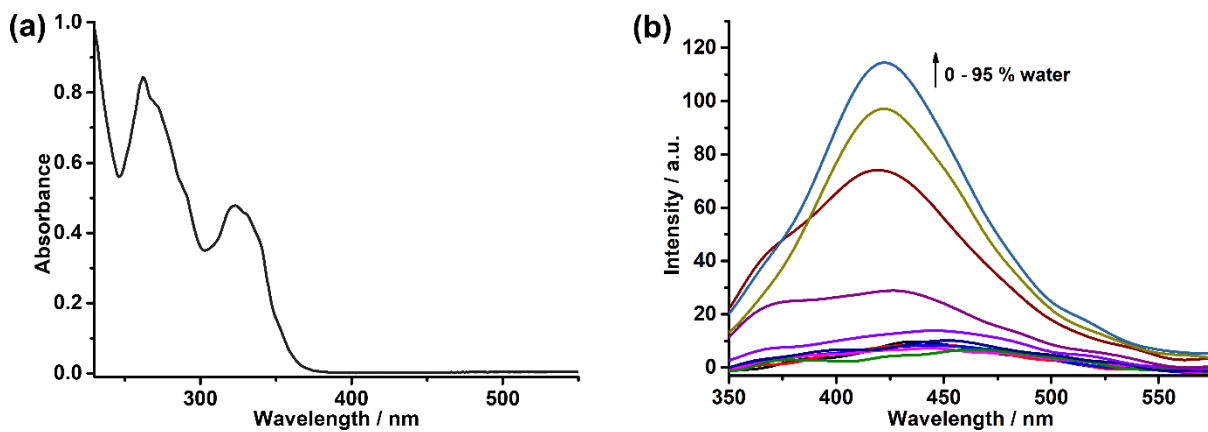

**Fig. S21.** (a) UV-vis spectrum of **L** ( $25 \mu\text{M}$ ), and (b) PL spectrum of **L** in methanol with different water (0-95%).

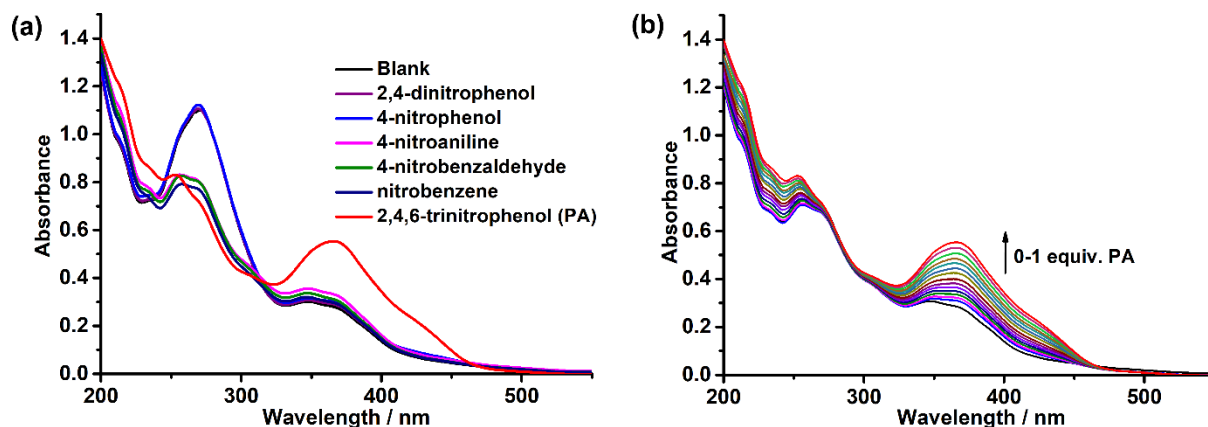

**Fig. S22.** (a) UV-vis selectivity of  $1[PF_6]$  (10  $\mu M$ ) in the presence of various NACs (10  $\mu M$ ) in 90% aqueous acetonitrile solution at room temperature, (b) UV-vis titration of  $1[PF_6]$  (10  $\mu M$ ) with PA (0-1 equiv.).

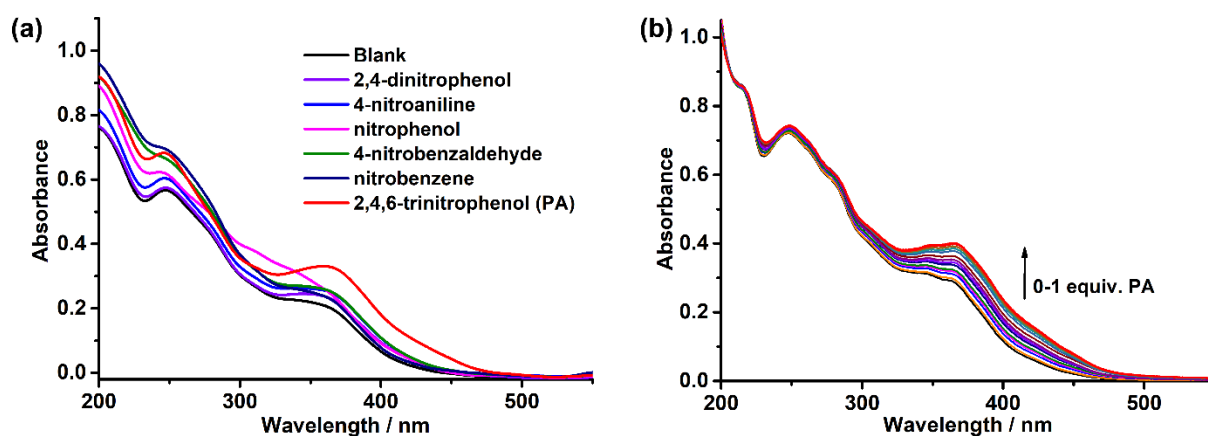

**Fig. S23.** (a) UV-vis selectivity of  $2[PF_6]$  (10  $\mu M$ ) in the presence of various NACs (10  $\mu M$ ) in 90% aqueous acetonitrile solution at room temperature, (b) UV-vis titration of  $2[PF_6]$  (10  $\mu M$ ) with PA (0-1 equiv.).

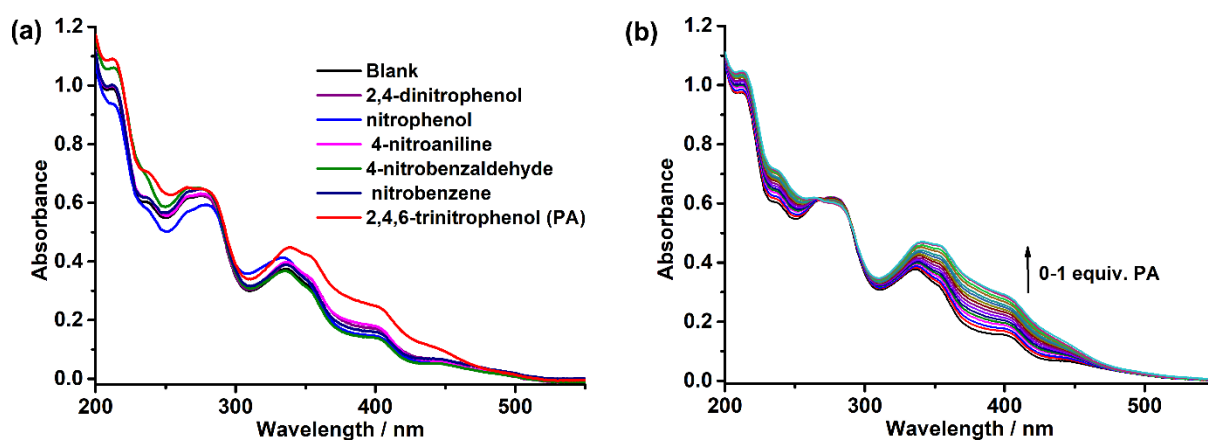

**Fig. S24.** (a) UV-vis selectivity of  $3[PF_6]$  (10  $\mu M$ ) in the presence of various NACs (10  $\mu M$ ) in 90% aqueous acetonitrile solution at room temperature, (b) UV-vis titration of  $3[PF_6]$  (10  $\mu M$ ) with PA (0-1 equiv.).

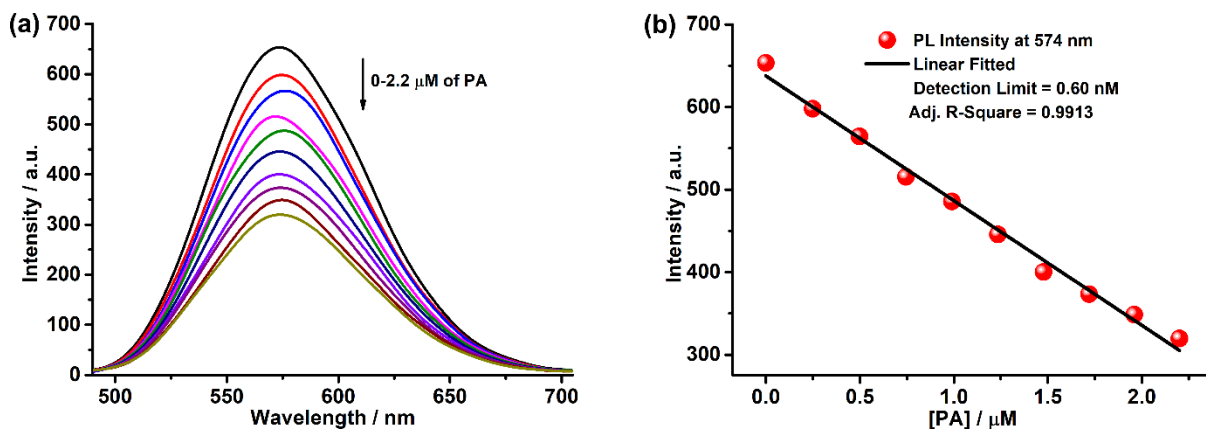

**Fig. S25.** (a) A PL titration of **1**[PF<sub>6</sub>] (10 μM) with PA (0–2.2 μM) for the calculation of the limit of detection. (b) A calibration curve over a PA concentration ranges from 0–2.2 μM.

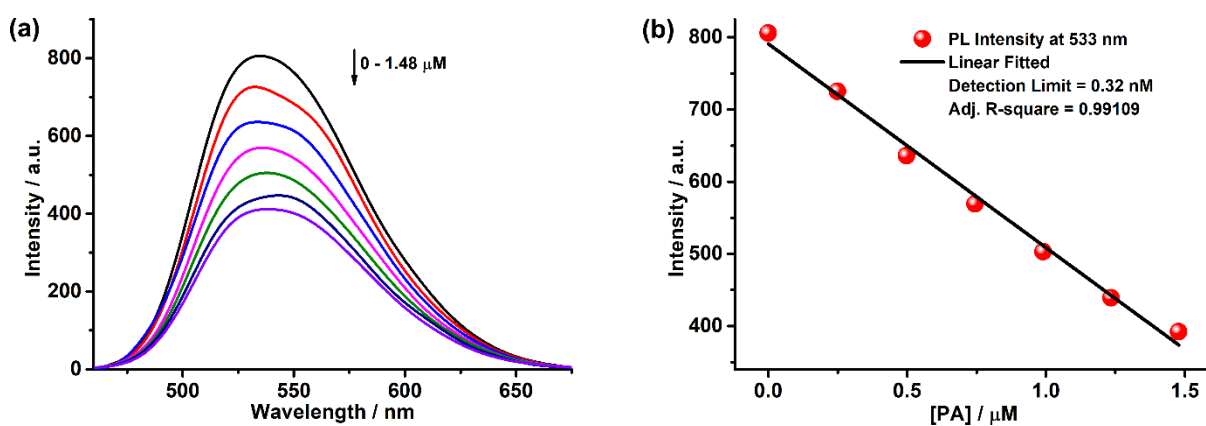

**Fig. S26.** (a) A PL titration of **2**[PF<sub>6</sub>] (10 μM) with PA (0–1.48 μM) for the calculation of the limit of detection. (b) A calibration curve over a PA concentration ranges from 0–1.48 μM.

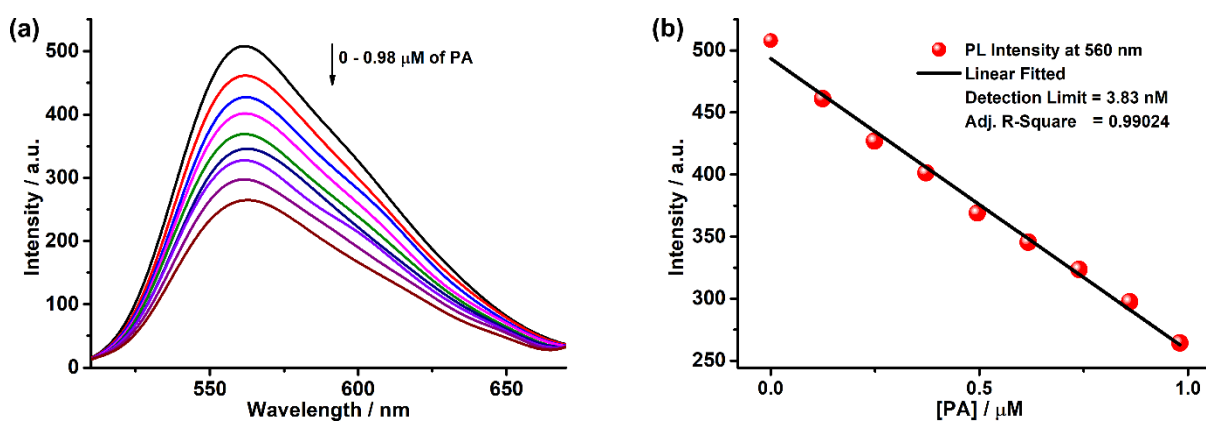

**Fig. S27.** (a) A PL titration of **3**[PF<sub>6</sub>] (10 μM) with PA (0–0.98 μM) for the calculation of the limit of detection. (b) A calibration curve over a PA concentration ranges from 0–0.98 μM.

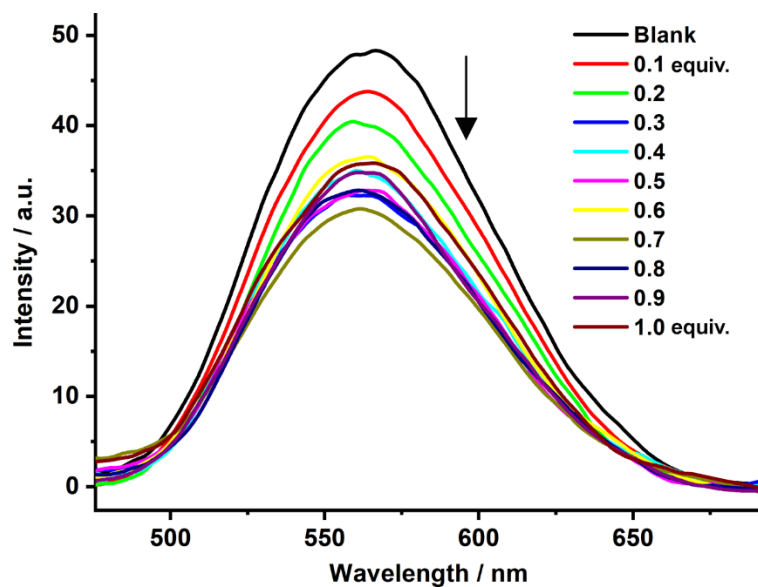

**Fig. S28.** PL titration of  $[\text{Ir}(\text{ppy})_2(\text{phen})]\text{PF}_6$  ( $10 \mu\text{M}$ ) with PA ( $0\text{--}10 \mu\text{M}$ ) [ $\lambda_{\text{ex}} = 358 \text{ nm}$ ,  $\lambda_{\text{em}} = 562 \text{ nm}$ ].

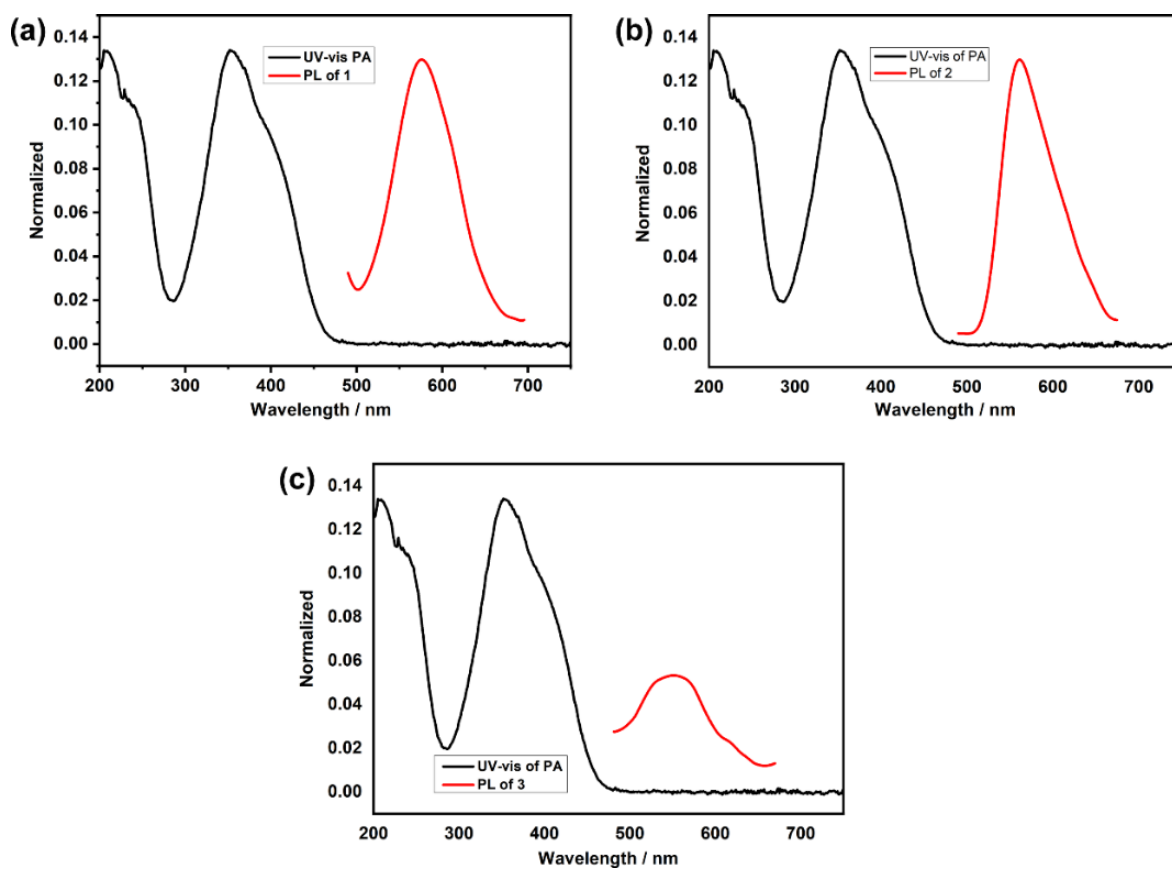

**Fig. S29.** Normalized UV–vis spectrum of PA and normalized emission spectrum of compound (a) **1** (b) **2** (c) **3** in 90% aqueous media.

**Table S1.** Crystal data and structure refinement for **1[PF<sub>6</sub>]**.

|                                                           |                                                                                           |                                                                                 |
|-----------------------------------------------------------|-------------------------------------------------------------------------------------------|---------------------------------------------------------------------------------|
| Empirical formula                                         | C <sub>46</sub> H <sub>32</sub> F <sub>6</sub> IrN <sub>4</sub> PS <sub>2</sub>           |                                                                                 |
| Formula weight                                            | 1042.04                                                                                   |                                                                                 |
| Temperature                                               | 293(2) K                                                                                  |                                                                                 |
| Wavelength                                                | 0.71073 Å                                                                                 |                                                                                 |
| Crystal system                                            | Monoclinic                                                                                |                                                                                 |
| Space group                                               | C2/c                                                                                      |                                                                                 |
| Unit cell dimensions                                      | $a = 24.115(5) \text{ \AA}$<br>$b = 20.342(5) \text{ \AA}$<br>$c = 17.437(4) \text{ \AA}$ | $\alpha = 90^\circ$ .<br>$\beta = 103.492(12)^\circ$ .<br>$\gamma = 90^\circ$ . |
| Volume                                                    | 8318(3) Å <sup>3</sup>                                                                    |                                                                                 |
| Z                                                         | 8                                                                                         |                                                                                 |
| Density (calculated)                                      | 1.664 Mg/m <sup>3</sup>                                                                   |                                                                                 |
| Absorption coefficient                                    | 3.415 mm <sup>-1</sup>                                                                    |                                                                                 |
| F(000)                                                    | 4112                                                                                      |                                                                                 |
| Crystal size                                              | 0.160 x 0.150 x 0.080 mm <sup>3</sup>                                                     |                                                                                 |
| Theta range for data collection                           | 1.325 to 28.451°.                                                                         |                                                                                 |
| Index ranges                                              | -31 ≤ h ≤ 32, -27 ≤ k ≤ 27, -23 ≤ l ≤ 23                                                  |                                                                                 |
| Reflections collected                                     | 109257                                                                                    |                                                                                 |
| Independent reflections                                   | 10437 [ <i>R</i> (int) = 0.0950]                                                          |                                                                                 |
| Completeness to theta = 25.242°                           | 100.0 %                                                                                   |                                                                                 |
| Absorption correction                                     | Semi-empirical from equivalents                                                           |                                                                                 |
| Max. and min. transmission                                | 0.789 and 0.612                                                                           |                                                                                 |
| Refinement method                                         | Full-matrix least-squares on F <sup>2</sup>                                               |                                                                                 |
| Data / restraints / parameters                            | 10437 / 0 / 542                                                                           |                                                                                 |
| Goodness-of-fit on F <sup>2</sup>                         | 1.083                                                                                     |                                                                                 |
| Final R indices [ <i>I</i> > 2σ( <i>I</i> )] <sup>a</sup> | <i>R</i> 1 = 0.0348, <i>wR</i> 2 = 0.0935                                                 |                                                                                 |
| R indices (all data) <sup>a</sup>                         | <i>R</i> 1 = 0.0555, <i>wR</i> 2 = 0.1150                                                 |                                                                                 |
| Largest diff. peak and hole                               | 0.728 and -1.397 e.Å <sup>-3</sup>                                                        |                                                                                 |

<sup>a</sup>  $R1 = \Sigma||F_o| - |F_c||/\Sigma|F_o|$ ;  $wR2 = \{\Sigma[w(F_o^2 - F_c^2)^2]/\Sigma w(F_o^2)^2\}^{1/2}$



**Table S2.** Selected bond lengths (Å) and angles (°) around the Ir(III) in complex **1**[PF<sub>6</sub>].

---

| <b>Bond lengths (Å)</b> |          |             |          |
|-------------------------|----------|-------------|----------|
| C(35)-Ir(1)             | 2.013(4) | C(46)-Ir(1) | 2.013(4) |
| N(1)-Ir(1)              | 2.155(3) | N(2)-Ir(1)  | 2.151(3) |
| N(3)-Ir(1)              | 2.048(3) | N(4)-Ir(1)  | 2.051(3) |

  

| <b>Bond angles (°)</b> |            |                  |            |
|------------------------|------------|------------------|------------|
| C(35)-Ir(1)-C(46)      | 90.69(16)  | C(35)-Ir(1)-N(3) | 80.07(15)  |
| C(46)-Ir(1)-N(3)       | 96.60(16)  | C(35)-Ir(1)-N(4) | 98.09(15)  |
| C(46)-Ir(1)-N(4)       | 79.92(16)  | N(3)-Ir(1)-N(4)  | 176.07(13) |
| C(35)-Ir(1)-N(2)       | 172.98(14) | C(46)-Ir(1)-N(2) | 96.05(15)  |
| N(3)-Ir(1)-N(2)        | 97.18(13)  | N(4)-Ir(1)-N(2)  | 85.04(13)  |
| C(35)-Ir(1)-N(1)       | 96.48(14)  | C(46)-Ir(1)-N(1) | 172.82(14) |
| N(3)-Ir(1)-N(1)        | 84.94(13)  | N(4)-Ir(1)-N(1)  | 98.74(14)  |
| N(2)-Ir(1)-N(1)        | 76.79(12)  |                  |            |

---

**Table S3.** Crystal data and structure refinement for complex **2[PF<sub>6</sub>]**.

|                                                           |                                                                                                              |                        |
|-----------------------------------------------------------|--------------------------------------------------------------------------------------------------------------|------------------------|
| Empirical formula                                         | C <sub>92</sub> H <sub>56</sub> F <sub>20</sub> Ir <sub>2</sub> N <sub>8</sub> P <sub>2</sub> S <sub>4</sub> |                        |
| Formula weight                                            | 2228.02                                                                                                      |                        |
| Temperature                                               | 293(2) K                                                                                                     |                        |
| Wavelength                                                | 0.71073 Å                                                                                                    |                        |
| Crystal system                                            | Triclinic                                                                                                    |                        |
| Space group                                               | <i>P</i> -1                                                                                                  |                        |
| Unit cell dimensions                                      | <i>a</i> = 13.6273(9) Å                                                                                      | <i>α</i> = 64.763(2)°. |
|                                                           | <i>b</i> = 18.5596(12) Å                                                                                     | <i>β</i> = 80.330(2)°. |
|                                                           | <i>c</i> = 19.5788(11) Å                                                                                     | <i>γ</i> = 80.923(2)°. |
| Volume                                                    | 4394.9(5) Å <sup>3</sup>                                                                                     |                        |
| Z                                                         | 2                                                                                                            |                        |
| Density (calculated)                                      | 1.684 Mg/m <sup>3</sup>                                                                                      |                        |
| Absorption coefficient                                    | 3.250 mm <sup>-1</sup>                                                                                       |                        |
| F(000)                                                    | 2184                                                                                                         |                        |
| Crystal size                                              | 0.720 x 0.210 x 0.180 mm <sup>3</sup>                                                                        |                        |
| Theta range for data collection                           | 1.996 to 28.370°.                                                                                            |                        |
| Index ranges                                              | -18 ≤ <i>h</i> ≤ 18, -24 ≤ <i>k</i> ≤ 24, -26 ≤ <i>l</i> ≤ 26                                                |                        |
| Reflections collected                                     | 165890                                                                                                       |                        |
| Independent reflections                                   | 21908 [ <i>R</i> (int) = 0.0608]                                                                             |                        |
| Completeness to theta = 25.242°                           | 99.9 %                                                                                                       |                        |
| Absorption correction                                     | Semi-empirical from equivalents                                                                              |                        |
| Max. and min. transmission                                | 0.592 and 0.203                                                                                              |                        |
| Refinement method                                         | Full-matrix least-squares on F <sup>2</sup>                                                                  |                        |
| Data / restraints / parameters                            | 21908 / 0 / 1153                                                                                             |                        |
| Goodness-of-fit on F <sup>2</sup>                         | 1.133                                                                                                        |                        |
| Final R indices [ <i>I</i> > 2σ( <i>I</i> )] <sup>a</sup> | <i>R</i> 1 = 0.0436, <i>wR</i> 2 = 0.0933                                                                    |                        |
| R indices (all data) <sup>a</sup>                         | <i>R</i> 1 = 0.0618, <i>wR</i> 2 = 0.1056                                                                    |                        |
| Largest diff. peak and hole                               | 2.295 and -1.117 e.Å <sup>-3</sup>                                                                           |                        |

<sup>a</sup>  $R1 = \Sigma||F_o| - |F_c||/\Sigma|F_o|$ ;  $wR2 = \{\Sigma[w(F_o^2 - F_c^2)^2]/\Sigma w(F_o^2)^2\}^{1/2}$

**Table S4.** Selected bond lengths (Å) and angles (°) around the Ir(III) in complex **2**[PF<sub>6</sub>].

---

| <b>Bond lengths (Å)</b> |          |             |          |
|-------------------------|----------|-------------|----------|
| C(35)-Ir(1)             | 2.004(6) | C(46)-Ir(1) | 1.998(6) |
| N(1)-Ir(1)              | 2.135(4) | N(2)-Ir(1)  | 2.140(4) |
| N(3)-Ir(1)              | 2.043(4) | N(4)-Ir(1)  | 2.044(4) |
| C(81)-Ir(2)             | 2.012(4) | C(92)-Ir(2) | 2.009(4) |
| N(5)-Ir(2)              | 2.137(3) | N(6)-Ir(2)  | 2.136(4) |
| N(7)-Ir(2)              | 2.035(4) | N(8)-Ir(2)  | 2.047(4) |

  

| <b>Bond angles (°)</b> |            |                   |            |
|------------------------|------------|-------------------|------------|
| C(46)-Ir(1)-C(35)      | 93.3(2)    | C(46)-Ir(1)-N(3)  | 96.7(2)    |
| C(35)-Ir(1)-N(3)       | 80.5(2)    | C(46)-Ir(1)-N(4)  | 80.3(2)    |
| C(35)-Ir(1)-N(4)       | 93.3(2)    | N(3)-Ir(1)-N(4)   | 172.96(17) |
| C(46)-Ir(1)-N(1)       | 171.3(2)   | C(35)-Ir(1)-N(1)  | 95.22(19)  |
| N(3)-Ir(1)-N(1)        | 86.47(15)  | N(4)-Ir(1)-N(1)   | 97.40(16)  |
| C(46)-Ir(1)-N(2)       | 94.1(2)    | C(35)-Ir(1)-N(2)  | 172.3(2)   |
| N(3)-Ir(1)-N(2)        | 96.64(17)  | N(4)-Ir(1)-N(2)   | 89.96(17)  |
| N(1)-Ir(1)-N(2)        | 77.43(15)  | C(92)-Ir(2)-C(81) | 89.19(16)  |
| C(92)-Ir(2)-N(7)       | 93.01(18)  | C(81)-Ir(2)-N(7)  | 80.54(18)  |
| C(92)-Ir(2)-N(8)       | 80.36(19)  | C(81)-Ir(2)-N(8)  | 95.11(19)  |
| N(7)-Ir(2)-N(8)        | 172.17(15) | C(92)-Ir(2)-N(6)  | 97.33(15)  |
| C(81)-Ir(2)-N(6)       | 173.31(15) | N(7)-Ir(2)-N(6)   | 97.57(15)  |
| N(8)-Ir(2)-N(6)        | 87.47(16)  | C(92)-Ir(2)-N(5)  | 174.29(15) |
| C(81)-Ir(2)-N(5)       | 96.42(15)  | N(7)-Ir(2)-N(5)   | 88.93(15)  |
| N(8)-Ir(2)-N(5)        | 98.06(16)  | N(6)-Ir(2)-N(5)   | 77.08(13)  |

---

**Table S5.** Crystal data and structure refinement for complex **3[PF<sub>6</sub>]•CH<sub>2</sub>Cl<sub>2</sub>**.

|                                                           |                                                                                                 |                         |
|-----------------------------------------------------------|-------------------------------------------------------------------------------------------------|-------------------------|
| Empirical formula                                         | C <sub>55</sub> H <sub>38</sub> Cl <sub>2</sub> F <sub>6</sub> IrN <sub>4</sub> PS <sub>2</sub> |                         |
| Formula weight                                            | 1227.08                                                                                         |                         |
| Temperature                                               | 293(2) K                                                                                        |                         |
| Wavelength                                                | 0.71073 Å                                                                                       |                         |
| Crystal system                                            | Monoclinic                                                                                      |                         |
| Space group                                               | <i>P</i> 21/n                                                                                   |                         |
| Unit cell dimensions                                      | <i>a</i> = 11.5156(6) Å                                                                         | <i>α</i> = 90°.         |
|                                                           | <i>b</i> = 15.6986(8) Å                                                                         | <i>β</i> = 100.737(2)°. |
|                                                           | <i>c</i> = 27.5367(13) Å                                                                        | <i>γ</i> = 90°.         |
| Volume                                                    | 4890.9(4) Å <sup>3</sup>                                                                        |                         |
| Z                                                         | 4                                                                                               |                         |
| Density (calculated)                                      | 1.666 Mg/m <sup>3</sup>                                                                         |                         |
| Absorption coefficient                                    | 3.024 mm <sup>-1</sup>                                                                          |                         |
| F(000)                                                    | 2432                                                                                            |                         |
| Crystal size                                              | 0.180 x 0.120 x 0.100 mm <sup>3</sup>                                                           |                         |
| Theta range for data collection                           | 1.500 to 28.522°.                                                                               |                         |
| Index ranges                                              | -15 ≤ <i>h</i> ≤ 15, -20 ≤ <i>k</i> ≤ 20, -36 ≤ <i>l</i> ≤ 36                                   |                         |
| Reflections collected                                     | 50197                                                                                           |                         |
| Independent reflections                                   | 12252 [ <i>R</i> (int) = 0.0680]                                                                |                         |
| Completeness to theta = 25.242°                           | 99.9 %                                                                                          |                         |
| Absorption correction                                     | Semi-empirical from equivalents                                                                 |                         |
| Max. and min. transmission                                | 0.746 and 0.343                                                                                 |                         |
| Refinement method                                         | Full-matrix least-squares on F <sup>2</sup>                                                     |                         |
| Data / restraints / parameters                            | 12252 / 0 / 640                                                                                 |                         |
| Goodness-of-fit on F <sup>2</sup>                         | 1.064                                                                                           |                         |
| Final R indices [ <i>I</i> > 2σ( <i>I</i> )] <sup>a</sup> | R1 = 0.0433, wR2 = 0.1030                                                                       |                         |
| R indices (all data) <sup>a</sup>                         | R1 = 0.0743, wR2 = 0.1240                                                                       |                         |
| Largest diff. peak and hole                               | 0.892 and -0.931 e.Å <sup>-3</sup>                                                              |                         |

<sup>a</sup> R1 = Σ||*F*<sub>o</sub>| - |*F*<sub>c</sub>||/Σ|*F*<sub>o</sub>|; wR2 = {Σ[*w*(*F*<sub>o</sub><sup>2</sup> - *F*<sub>c</sub><sup>2</sup>)<sup>2</sup>]/Σ*w*(*F*<sub>o</sub><sup>2</sup>)<sup>2</sup>}<sup>1/2</sup>.

**Table S6.** Selected bond lengths (Å) and angles (°) around the Ir(III) in complex **3[PF<sub>6</sub>]•CH<sub>2</sub>Cl<sub>2</sub>**.

---

| <b>Bond lengths (Å)</b> |          |             |          |
|-------------------------|----------|-------------|----------|
| C(39)-Ir(1)             | 2.002(5) | C(54)-Ir(1) | 1.996(5) |
| N(1)-Ir(1)              | 2.154(4) | N(2)-Ir(1)  | 2.206(4) |
| N(3)-Ir(1)              | 2.087(4) | N(4)-Ir(1)  | 2.084(4) |

  

| <b>Bond angles (°)</b> |            |                  |            |
|------------------------|------------|------------------|------------|
| C(54)-Ir(1)-C(39)      | 91.8(2)    | C(54)-Ir(1)-N(4) | 79.91(18)  |
| C(39)-Ir(1)-N(4)       | 94.16(18)  | C(54)-Ir(1)-N(3) | 94.36(18)  |
| C(39)-Ir(1)-N(3)       | 79.90(19)  | N(4)-Ir(1)-N(3)  | 171.68(14) |
| C(54)-Ir(1)-N(1)       | 170.71(16) | C(39)-Ir(1)-N(1) | 97.32(17)  |
| N(4)-Ir(1)-N(1)        | 100.85(15) | N(3)-Ir(1)-N(1)  | 85.78(14)  |
| C(54)-Ir(1)-N(2)       | 96.18(17)  | C(39)-Ir(1)-N(2) | 167.99(18) |
| N(4)-Ir(1)-N(2)        | 78.52(14)  | N(3)-Ir(1)-N(2)  | 108.28(14) |
| N(1)-Ir(1)-N(2)        | 75.02(14)  |                  |            |

---

### Calculation of Limit of Detection

The detection limit was calculated based on PL titration data. To determine the S/N ratio, the standard deviation of the blank solution was calculated with ten replicate data of the complexes in PL spectroscopy. Finally, the limit of detection (LOD) of **1[PF<sub>6</sub>]**, **2[PF<sub>6</sub>]**, and **3[PF<sub>6</sub>]** for picric acid was determined from the following equation.

$$\text{LOD} = 3\sigma/K$$

Here  $\sigma$  is the standard deviation of the blank solution, and K is the slope obtained from the plot of the calibration curve.

### Calculation of Quantum Yield

The quantum yields of **1[PF<sub>6</sub>]**, **2[PF<sub>6</sub>]**, and **3[PF<sub>6</sub>]** were determined in dry and deaerated CH<sub>3</sub>CN. [Ru(bpy)<sub>3</sub>](PF<sub>6</sub>)<sub>2</sub> ( $\Phi_R = 0.062$  in acetonitrile) for **1[PF<sub>6</sub>]** and **3[PF<sub>6</sub>]**; Quinine sulfate ( $\Phi_R = 0.60$  in 0.5 M H<sub>2</sub>SO<sub>4</sub>) for **2[PF<sub>6</sub>]** were used as a references.<sup>1</sup> The quantum yield is calculated according to the following equation:

$$\Phi_S = \Phi_R \times \frac{1 - 10^{-A_R}}{1 - 10^{-A_S}} \times \frac{I_S}{I_R} \times \frac{\eta_S^2}{\eta_R^2}$$

Where S and R indicate the unknown and standard solutions, respectively,  $\Phi$  is the quantum yield, I is the integrated area under the emission spectra, A is the absorbance, and  $\eta$  is the refractive index of the solvent.

### Electrochemistry

A three electrodes cell system was taken for electrochemical analysis. The setup contains a Pt working electrode, a Pt wire auxiliary electrode, and an Ag wire as a pseudo-reference electrode. Experiments were performed on 1.0 mM dry and degassed (N<sub>2</sub>) acetonitrile solution of **1[PF<sub>6</sub>]**, **2[PF<sub>6</sub>]**, and **3[PF<sub>6</sub>]** in the presence of supporting electrolyte tetra-n-butylammonium

perchlorate (0.10 M). To compare the oxidation potential of these complexes, the cyclic voltammetry data of  $[\text{Ir}(\text{ppy})_2\text{phen}]^+$  was also collected under the same experimental conditions. The electrochemical potential window was calibrated using ferrocene (as the internal standard) after each experiment. The standard redox potential of the ferrocene/ferrocenium ( $\text{Fc}/\text{Fc}^+$ ) couple was taken as +0.400 V vs. Ag wire electrode.<sup>2</sup> A scan rate of  $100 \text{ mV s}^{-1}$  was fixed for all the measurements.

### Calculation of Excited States Lifetimes

The luminescence lifetimes of **1**[PF<sub>6</sub>], **2**[PF<sub>6</sub>] and **3**[PF<sub>6</sub>] (10  $\mu\text{M}$ ) in the absence and presence of PA (1 equiv.) in acetonitrile and 90% aqueous media, were measured using TCSPC based fluorescence lifetime detection unit (PM-3) supplied by PTI. The sample was excited by 374 nm laser diode supplied by PTI. The fluorescence decays were monitored at the corresponding emission maxima as observed in the steady-state fluorescence measurement. The collected fluorescence decay traces from the sample were analyzed by non-linear least square analysis based on the Levenberg–Marquardt algorithm with reference to the instrument response function (IRF), collected at the excitation wavelength using a scattering solution. Validity of the fitting analysis was investigated by various statistical parameters like the Durbin-Watson (DW) and reduced chi-squared ( $\chi^2$ ) parameter values and visually observing the distribution of weighted residuals. The fluorescence decay was found to be both single exponential and double exponential fitting model to adequately describe the obtained decay traces. Average lifetimes ( $\langle\tau\rangle$ ) were calculated using the following decay equation

$$\langle\tau\rangle = \sum \alpha_i \tau_i$$

Whereas,  $\alpha_i$  is the amplitude of the  $i^{\text{th}}$  decay component ( $\alpha_i = \alpha_i/\sum\alpha_i$ ) and  $\tau_i$  is the excited state luminescence lifetime of the  $i^{\text{th}}$  component.

**Table S7:** TCSPS Data for the fluorescence lifetime calculation

| <b>Compound</b>                                  | $\tau_1$ | $\tau_2$ | $\alpha_1$ | $\alpha_2$ | $\tau_{av}$ |
|--------------------------------------------------|----------|----------|------------|------------|-------------|
| <b>1[PF<sub>6</sub>]</b><br>(single exponential) | 112      | 0        | 100        | 0          | 112 ns      |
| <b>1[PF<sub>6</sub>] +PA</b>                     | 56.81    | 7.026    | 63.47      | 36.53      | 53.5 ns     |
| <b>2[PF<sub>6</sub>]</b><br>(single exponential) | 138      | 0        | 100        | 0          | 138 ns      |
| <b>2[PF<sub>6</sub>] +PA</b>                     | 0.33     | 11.6     | 99.76      | 0.24       | 1.21 ns     |
| <b>3[PF<sub>6</sub>]</b><br>(single exponential) | 140      | 0        | 100        | 0          | 140 ns      |
| <b>3[PF<sub>6</sub>] +PA</b>                     | 51.52    | 5.925    | 64.94      | 35.06      | 48.85 ns    |



## Computational Studies

The geometry optimization of complex **1**, **2**, **3** and Picric acid (singlet) was performed with the Gaussian 09 and Gaussian 16 program packages using density functional theory (DFT). The B3LYP/6-31G(d,p)<sup>3</sup> basis set was used for C, H, N, F, and S, together with the LANL2DZ<sup>4</sup> for iridium. Time-dependent density functional theory (TDDFT) calculations at the ground-state geometry in acetonitrile were performed in conjunction with the conductor-like polarizable continuum model (CPCM)<sup>5</sup> for acetonitrile with a spin-restricted formalism to examine low-energy excitations at the same level of calculation. The triplet states TDDFT calculations were performed using the optimized ground state geometries at the same level as used in singlet state optimizations, along with CPCM for acetonitrile. A spin-unrestricted formalism was employed for singlet-triplet transitions in triplet states TDDFT calculations to study the nature of the non-emissive and emissive states of complex **1**, **2**, and **3**, respectively.

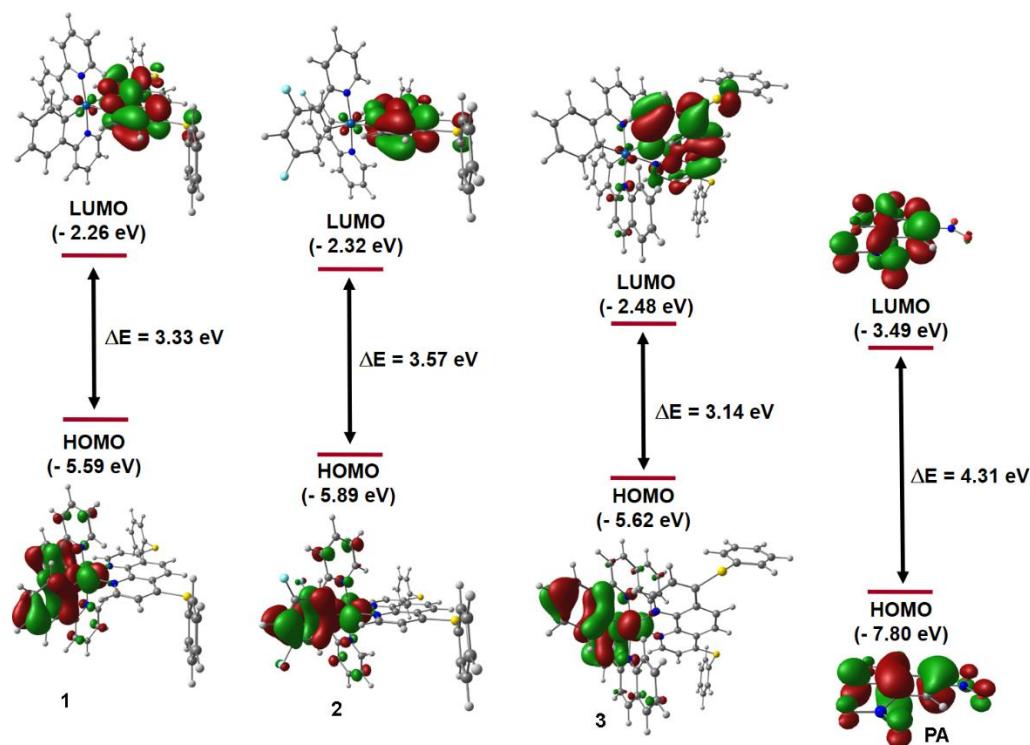

**Fig. S30:** Frontiers orbitals (HOMO and LUMO) of compounds **1**, **2**, **3** and PA for PET demonstration from compounds LUMO to the LUMO of PA.

**Table S8:** Excited states, their energies and oscillator strengths of compound **1[PF<sub>6</sub>]**, **2[PF<sub>6</sub>]** and **3[PF<sub>6</sub>]**

**1[PF<sub>6</sub>]**

---

|                          |                |                  |                  |                     |                           |
|--------------------------|----------------|------------------|------------------|---------------------|---------------------------|
| Excited State 21:        | 3.015-A        | 1.8250 eV        | 679.36 nm        | f=0.0000            | <S**2>=2.022              |
| 177B ->192B              | 0.10752        |                  |                  |                     |                           |
| 183B ->192B              | 0.99290        |                  |                  |                     |                           |
| Excited State 22:        | 3.015-A        | 1.9029 eV        | 651.54 nm        | f=0.0002            | <S**2>=2.023              |
| 181B ->192B              | 0.98489        |                  |                  |                     |                           |
| 182B ->192B              | -0.10838       |                  |                  |                     |                           |
| Excited State 23:        | 3.015-A        | 1.9035 eV        | 651.35 nm        | f=0.0000            | <S**2>=2.023              |
| 180B ->192B              | -0.11979       |                  |                  |                     |                           |
| 181B ->192B              | 0.10835        |                  |                  |                     |                           |
| 182B ->192B              | 0.98582        |                  |                  |                     |                           |
| Excited State 24:        | 3.012-A        | 1.9407 eV        | 638.85 nm        | f=0.0003            | <S**2>=2.018              |
| 193A ->202A              | -0.45237       |                  |                  |                     |                           |
| 193A ->205A              | 0.88971        |                  |                  |                     |                           |
| Excited State 25:        | 3.014-A        | 1.9536 eV        | 634.64 nm        | f=0.0208            | <S**2>=2.021              |
| 193A ->208A              | 0.13471        |                  |                  |                     |                           |
| 178B ->192B              | 0.90260        |                  |                  |                     |                           |
| 184B ->192B              | 0.32515        |                  |                  |                     |                           |
| Excited State 26:        | 3.018-A        | 2.0357 eV        | 609.05 nm        | f=0.0018            | <S**2>=2.026              |
| 193A ->204A              | 0.99810        |                  |                  |                     |                           |
| <b>Excited State 27:</b> | <b>3.017-A</b> | <b>2.0705 eV</b> | <b>598.80 nm</b> | <b>f=0.0005</b>     | <b>&lt;S**2&gt;=2.026</b> |
| <b>193A -&gt;203A</b>    | <b>0.46320</b> |                  |                  | <b>HOMO→LUMO+9</b>  |                           |
| <b>193A -&gt;206A</b>    | <b>0.88464</b> |                  |                  | <b>HOMO→LUMO+12</b> |                           |
| Excited State 28:        | 3.013-A        | 2.1451 eV        | 577.98 nm        | f=0.0040            | <S**2>=2.020              |
| 174B ->192B              | 0.22304        |                  |                  |                     |                           |
| 176B ->192B              | 0.30048        |                  |                  |                     |                           |
| 177B ->192B              | 0.89983        |                  |                  |                     |                           |
| 183B ->192B              | -0.11480       |                  |                  |                     |                           |
| Excited State 29:        | 3.023-A        | 2.1586 eV        | 574.37 nm        | f=0.1781            | <S**2>=2.034              |
| 193A ->208A              | 0.87151        |                  |                  |                     |                           |
| 193A ->209A              | 0.40236        |                  |                  |                     |                           |
| 178B ->192B              | -0.15447       |                  |                  |                     |                           |
| 191B ->195B              | -0.14351       |                  |                  |                     |                           |
| Excited State 30:        | 3.014-A        | 2.2659 eV        | 547.19 nm        | f=0.0003            | <S**2>=2.021              |
| 193A ->201A              | -0.23286       |                  |                  |                     |                           |
| 193A ->207A              | 0.96447        |                  |                  |                     |                           |
| Excited State 31:        | 3.017-A        | 2.4262 eV        | 511.03 nm        | f=0.0327            | <S**2>=2.026              |
| 174B ->192B              | 0.33173        |                  |                  |                     |                           |
| 176B ->192B              | 0.83430        |                  |                  |                     |                           |
| 177B ->192B              | -0.36990       |                  |                  |                     |                           |
| Excited State 32:        | 3.014-A        | 2.5814 eV        | 480.30 nm        | f=0.0004            | <S**2>=2.021              |
| 193A ->208A              | -0.42074       |                  |                  |                     |                           |
| 193A ->209A              | 0.90472        |                  |                  |                     |                           |

Excited State 33: 3.014-A 2.7023 eV 458.80 nm f=0.0008 <S\*\*2>=2.021  
 193A ->210A 0.97899  
 174B ->192B -0.15400

Excited State 34: 3.032-A 2.7365 eV 453.08 nm f=0.0311 <S\*\*2>=2.048  
 193A ->210A 0.17029  
 174B ->192B 0.87598  
 176B ->192B -0.40389

Excited State 35: 3.039-A 2.7622 eV 448.85 nm f=0.0137 <S\*\*2>=2.059  
 173B ->192B -0.20236  
 175B ->192B 0.96155

---

**2[PF<sub>6</sub>]**

---

Excited State 18: 3.012-A 1.8332 eV 676.32 nm f=0.0149 <S\*\*2>=2.018  
 209A ->213A 0.52645  
 209A ->214A 0.35021  
 209A ->216A 0.74158  
 209A ->221A -0.11320

Excited State 19: 3.010-A 1.8412 eV 673.40 nm f=0.0001 <S\*\*2>=2.014  
 209A ->215A 0.98512

Excited State 20: 3.011-A 1.8641 eV 665.10 nm f=0.0016 <S\*\*2>=2.016  
 209A ->213A -0.19629  
 209A ->214A 0.93500  
 209A ->216A -0.28052

Excited State 21: 3.009-A 1.9572 eV 633.47 nm f=0.0050 <S\*\*2>=2.014  
 190B ->208B -0.13340  
 192B ->208B 0.10464  
 194B ->208B 0.95999

Excited State 22: 3.013-A 2.1431 eV 578.54 nm f=0.0000 <S\*\*2>=2.019  
 209A ->217A 0.99553

**Excited State 23: 3.031-A 2.2952 eV 540.19 nm f=0.2024 <S\*\*2>=2.047**  
**209A ->216A 0.12257 HOMO→LUMO+6**  
**209A ->218A 0.16128 HOMO→LUMO+8**  
 209A ->219A -0.18640  
**209A ->221A 0.85494 HOMO→LUMO+11**  
**209A ->222A 0.15586 HOMO→LUMO+12**  
 185B ->208B 0.10080  
 187B ->208B -0.15018  
 189B ->208B 0.14899  
 195B ->208B -0.12537  
 201B ->208B -0.12345  
 205B ->208B 0.10035

Excited State 24: 3.011-A 2.3061 eV 537.63 nm f=0.0024 <S\*\*2>=2.017  
 190B ->208B -0.29395  
 192B ->208B 0.62812  
 193B ->208B 0.69466  
 194B ->208B -0.10490

Excited State 25: 3.012-A 2.3478 eV 528.08 nm f=0.0005 <S\*\*2>=2.018  
 190B ->208B 0.56340  
 192B ->208B -0.45346  
 193B ->208B 0.66452  
 194B ->208B 0.13957

Excited State 26: 3.011-A 2.4704 eV 501.87 nm f=0.0005 <S\*\*2>=2.016  
209A ->218A 0.93758  
209A ->219A -0.25275  
209A ->221A -0.21385

Excited State 27: 3.013-A 2.5695 eV 482.52 nm f=0.0007 <S\*\*2>=2.019  
190B ->208B 0.56223  
191B ->208B 0.63464  
192B ->208B 0.47899  
193B ->208B -0.17255

Excited State 28: 3.012-A 2.5969 eV 477.42 nm f=0.0020 <S\*\*2>=2.018  
190B ->208B -0.48498  
191B ->208B 0.76380  
192B ->208B -0.37489  
193B ->208B 0.16613

Excited State 29: 3.011-A 2.6145 eV 474.22 nm f=0.0004 <S\*\*2>=2.016  
209A ->220A 0.90735  
209A ->222A 0.34826  
209A ->223A 0.11164  
209A ->224A -0.15463

Excited State 30: 3.016-A 2.6792 eV 462.76 nm f=0.0037 <S\*\*2>=2.024  
209A ->216A 0.11811  
209A ->218A 0.28529  
209A ->219A 0.92336  
209A ->221A 0.13973

Excited State 31: 3.014-A 2.6936 eV 460.29 nm f=0.0009 <S\*\*2>=2.020  
209A ->220A -0.34368  
209A ->221A -0.17415  
209A ->222A 0.77038  
209A ->223A 0.48822

---

### 3[PF<sub>6</sub>]

---

Excited State 22: 3.012-A 2.0487 eV 605.18 nm f=0.0020 <S\*\*2>=2.018  
219A -> 229A -0.57348  
206B -> 218B 0.59782  
207B -> 218B 0.34945  
208B -> 218B 0.40695

Excited State 23: 3.012-A 2.0496 eV 604.93 nm f=0.0032 <S\*\*2>=2.018  
219A -> 229A 0.79317  
206B -> 218B 0.42571  
207B -> 218B 0.26573  
208B -> 218B 0.28995

Excited State 24: 3.012-A 2.0663 eV 600.02 nm f=0.0001 <S\*\*2>=2.017  
204B -> 218B -0.15131  
206B -> 218B -0.49317  
207B -> 218B 0.85383

Excited State 25: 3.016-A 2.0797 eV 596.16 nm f=0.0043 <S\*\*2>=2.024  
219A -> 230A 0.20701  
219A -> 231A -0.18070  
219A -> 232A -0.17681  
219A -> 234A -0.15116  
202B -> 218B 0.79284

203B -> 218B 0.38249  
204B -> 218B 0.16806

Excited State 26: 3.015-A 2.1350 eV 580.73 nm f=0.0065 <S\*\*2>=2.022

219A -> 229A 0.11560  
219A -> 230A 0.59146  
219A -> 231A -0.54280  
219A -> 232A -0.40473  
219A -> 233A -0.10025  
219A -> 235A -0.20423  
202B -> 218B -0.26891  
203B -> 218B -0.14600

Excited State 27: 3.016-A 2.1686 eV 571.73 nm f=0.0159 <S\*\*2>=2.024

219A -> 229A 0.10817 HOMO→LUMO+9  
219A -> 230A 0.31841 HOMO→LUMO+10  
219A -> 231A -0.13624  
219A -> 232A 0.79196 HOMO→LUMO+12  
219A -> 234A -0.27219  
219A -> 235A -0.33046  
200B -> 218B 0.11751

Excited State 28: 3.011-A 2.2142 eV 559.96 nm f=0.0045 <S\*\*2>=2.016

219A -> 232A -0.13535  
219A -> 234A 0.11034  
199B -> 218B -0.12541  
200B -> 218B 0.67234  
201B -> 218B 0.15641  
202B -> 218B 0.28573  
203B -> 218B -0.54929  
205B -> 218B -0.16810

Excited State 29: 3.015-A 2.2997 eV 539.13 nm f=0.0186 <S\*\*2>=2.023

219A -> 232A -0.10725  
219A -> 233A 0.77504  
219A -> 234A -0.42667  
219A -> 235A 0.15700  
200B -> 218B 0.12185  
201B -> 218B -0.31116  
202B -> 218B -0.10153  
203B -> 218B -0.10255

Excited State 30: 3.018-A 2.3478 eV 528.09 nm f=0.0257 <S\*\*2>=2.027

219A -> 233A 0.27426  
219A -> 234A -0.13596  
219A -> 236A -0.13469  
197B -> 218B -0.10005  
199B -> 218B 0.17302  
200B -> 218B -0.22905  
201B -> 218B 0.84527  
203B -> 218B -0.17222

Excited State 31: 3.011-A 2.3765 eV 521.71 nm f=0.0088 <S\*\*2>=2.017

219A -> 234A 0.11832  
197B -> 218B 0.25943  
198B -> 218B -0.23809  
199B -> 218B 0.86934  
201B -> 218B -0.14037  
202B -> 218B 0.10478  
203B -> 218B -0.12902

Excited State 32: 3.010-A 2.3866 eV 519.50 nm f=0.0010 <S\*\*2>=2.016  
219A -> 230A 0.64148  
219A -> 231A 0.74418

Excited State 33: 3.014-A 2.4043 eV 515.67 nm f=0.0096 <S\*\*2>=2.021  
219A -> 230A 0.15231  
219A -> 231A -0.14167  
219A -> 232A 0.26603  
219A -> 233A 0.43771  
219A -> 234A 0.78134  
219A -> 235A 0.12581  
197B -> 218B -0.10396  
203B -> 218B 0.14052

Excited State 34: 3.016-A 2.4444 eV 507.21 nm f=0.0060 <S\*\*2>=2.024  
219A -> 230A 0.20211  
219A -> 231A -0.20689  
219A -> 232A 0.20562  
219A -> 233A -0.26392  
219A -> 234A -0.10913  
219A -> 235A 0.87310

Excited State 35: 3.012-A 2.4618 eV 503.64 nm f=0.0063 <S\*\*2>=2.018  
219A -> 234A -0.11745  
219A -> 236A -0.16750  
198B -> 218B -0.14852  
200B -> 218B 0.60206  
201B -> 218B 0.23406  
202B -> 218B -0.31064  
203B -> 218B 0.59939  
205B -> 218B 0.14386

Excited State 36: 3.015-A 2.5309 eV 489.88 nm f=0.0174 <S\*\*2>=2.023  
219A -> 228A -0.12150  
219A -> 233A 0.14512  
219A -> 236A 0.93639  
197B -> 218B 0.10330  
200B -> 218B 0.10140  
201B -> 218B 0.16281

Excited State 37: 3.924-A 2.6400 eV 469.64 nm f=0.0116 <S\*\*2>=3.600  
213A -> 220A -0.25526  
213A -> 221A 0.17200  
213A -> 223A 0.12702  
214A -> 220A 0.20045  
214A -> 221A -0.12492  
215A -> 220A -0.37933  
215A -> 221A 0.21936  
217A -> 220A 0.20564  
217A -> 221A -0.10832

---

**Table S9.** The x,y,z Cartesian coordinates of the complex **1** calculated using Gaussian09 at B3LYP/6-31G(d,p) level and LANL2DZ for iridium in the ground state.

|   | X       | Y       | Z       |    | X       | Y       | Z       |
|---|---------|---------|---------|----|---------|---------|---------|
| C | 4.6061  | -0.3749 | 10.5217 | H  | 2.0002  | 3.0571  | 6.4326  |
| H | 3.8181  | -0.4959 | 11.2795 | C  | 0.675   | 2.1433  | 7.9771  |
| C | 5.1515  | -1.5585 | 9.8443  | H  | -0.1927 | 2.0267  | 7.3073  |
| H | 4.7038  | -2.5445 | 10.0453 | C  | 0.5938  | 1.723   | 9.3756  |
| C | 6.242   | -1.427  | 8.8647  | H  | -0.3396 | 1.289   | 9.7662  |
| C | 6.707   | -0.0761 | 8.5217  | C  | 1.7678  | 1.892   | 10.2333 |
| C | 7.7627  | 0.2257  | 7.5422  | C  | 1.8217  | 1.537   | 11.6492 |
| H | 8.2538  | -0.5869 | 6.9842  | C  | 0.7413  | 0.9512  | 12.4414 |
| C | 8.1788  | 1.6173  | 7.2931  | H  | -0.247  | 0.7563  | 11.9971 |
| H | 8.9673  | 1.8146  | 6.5501  | C  | 0.9884  | 0.6184  | 13.8475 |
| C | 7.5507  | 2.7285  | 8.0249  | H  | 0.1827  | 0.1771  | 14.4569 |
| C | 7.8938  | 4.1468  | 7.8536  | C  | 2.3049  | 0.8646  | 14.4455 |
| C | 7.1113  | 5.1451  | 8.5999  | H  | 2.4864  | 0.6033  | 15.5009 |
| H | 7.2511  | 6.2193  | 8.4006  | C  | 3.3814  | 1.4528  | 13.644  |
| C | 6.0883  | 4.7248  | 9.5664  | H  | 4.3728  | 1.6205  | 14.0906 |
| H | 5.5082  | 5.4848  | 10.1103 | C  | 3.1239  | 1.8008  | 12.2484 |
| C | 6.0961  | 1.041   | 9.2259  | C  | 6.8825  | 1.8409  | 12.5675 |
| C | 6.519   | 2.4026  | 8.9976  | H  | 6.8828  | 0.9139  | 11.9759 |
| C | 6.7965  | -4.5595 | 8.7662  | C  | 7.9154  | 2.0443  | 13.5857 |
| C | 6.5441  | -4.755  | 10.1977 | H  | 8.6979  | 1.2836  | 13.7409 |
| H | 6.5045  | -3.8908 | 10.8796 | C  | 7.8994  | 3.2599  | 14.3992 |
| C | 6.4031  | -6.1071 | 10.7418 | H  | 8.6713  | 3.428   | 15.168  |
| H | 6.1919  | -6.2496 | 11.8144 | C  | 6.8408  | 4.2458  | 14.1835 |
| C | 6.5606  | -7.2699 | 9.8671  | H  | 6.8097  | 5.1617  | 14.7935 |
| H | 6.4537  | -8.2876 | 10.2771 | C  | 5.8355  | 3.9882  | 13.1512 |
| C | 6.8757  | -7.0795 | 8.4507  | C  | 4.7099  | 4.8686  | 12.8485 |
| H | 7.0135  | -7.9547 | 7.7946  | C  | 4.3993  | 6.14    | 13.5006 |
| C | 7.0036  | -5.7274 | 7.9035  | H  | 5.0209  | 6.5215  | 14.3254 |
| H | 7.2398  | -5.5922 | 6.8352  | C  | 3.2415  | 6.9126  | 13.0407 |
| C | 9.9947  | 6.2926  | 6.8001  | H  | 2.995   | 7.8722  | 13.524  |
| C | 10.7195 | 6.8097  | 5.6347  | C  | 2.4129  | 6.4168  | 11.9367 |
| H | 10.7717 | 6.2167  | 4.7068  | H  | 1.5489  | 7.0074  | 11.5902 |
| C | 11.3588 | 8.1259  | 5.6891  | C  | 2.7318  | 5.1416  | 11.2892 |
| H | 11.8865 | 8.5191  | 4.8047  | H  | 2.1198  | 4.7818  | 10.4488 |
| C | 11.2936 | 8.9219  | 6.9155  | C  | 3.8758  | 4.3663  | 11.764  |
| H | 11.7657 | 9.9174  | 6.9534  | N  | 5.0881  | 0.9057  | 10.1887 |
| C | 10.6141 | 8.3875  | 8.0965  | N  | 5.8365  | 3.3537  | 9.7668  |
| H | 10.587  | 8.9749  | 9.0289  | N  | 2.9718  | 2.439   | 9.7272  |
| C | 9.9861  | 7.0657  | 8.0464  | N  | 5.8854  | 2.8179  | 12.356  |
| H | 9.5486  | 6.6398  | 8.9633  | S  | 6.9365  | -2.8958 | 8.0595  |
| C | 3.0638  | 2.8706  | 8.3863  | S  | 9.1907  | 4.6707  | 6.6997  |
| H | 3.9925  | 3.3281  | 8.0153  | Ir | 4.4804  | 2.6038  | 10.9875 |
| C | 1.9217  | 2.7257  | 7.4809  |    |         |         |         |

**Table S10.** The x,y,z Cartesian coordinates of the complex **2** calculated using Gaussian09 at B3LYP/6-31G(d,p) level and LANL2DZ for iridium in the ground state.

|   | X      | Y      | Z      |    | X      | Y      | Z      |
|---|--------|--------|--------|----|--------|--------|--------|
| C | 5.759  | 4.881  | 13.271 | H  | 4.827  | 9.529  | 10.769 |
| H | 5.014  | 4.96   | 13.824 | C  | 5.237  | 10.951 | 12.07  |
| C | 5.801  | 3.836  | 12.353 | H  | 4.912  | 11.655 | 11.555 |
| H | 5.089  | 3.239  | 12.31  | C  | 5.771  | 11.188 | 13.326 |
| C | 6.87   | 3.669  | 11.511 | H  | 5.814  | 12.059 | 13.65  |
| C | 7.937  | 4.599  | 11.628 | C  | 6.262  | 10.105 | 14.137 |
| C | 9.103  | 4.581  | 10.81  | C  | 6.839  | 10.158 | 15.483 |
| H | 9.2    | 3.916  | 10.168 | C  | 7.033  | 11.302 | 16.29  |
| C | 10.071 | 5.515  | 10.949 | C  | 7.573  | 11.267 | 17.557 |
| H | 10.8   | 5.495  | 10.372 | H  | 7.701  | 12.041 | 18.058 |
| C | 10.014 | 6.528  | 11.95  | C  | 7.907  | 10.054 | 18.032 |
| C | 11.029 | 7.517  | 12.167 | C  | 7.739  | 8.877  | 17.329 |
| C | 10.835 | 8.421  | 13.176 | H  | 7.988  | 8.065  | 17.707 |
| H | 11.464 | 9.088  | 13.332 | C  | 7.193  | 8.922  | 16.05  |
| C | 9.719  | 8.341  | 13.952 | C  | 8.7    | 5.612  | 16.45  |
| H | 9.641  | 8.947  | 14.653 | H  | 9.359  | 5.936  | 15.879 |
| C | 7.824  | 5.609  | 12.584 | C  | 9.088  | 4.769  | 17.456 |
| C | 8.89   | 6.574  | 12.764 | H  | 9.981  | 4.531  | 17.562 |
| C | 5.471  | 1.546  | 10.392 | C  | 8.144  | 4.29   | 18.29  |
| C | 4.351  | 2.138  | 9.89   | H  | 8.375  | 3.709  | 18.979 |
| H | 4.374  | 3.027  | 9.616  | C  | 6.813  | 4.677  | 18.106 |
| C | 3.168  | 1.402  | 9.791  | H  | 6.161  | 4.354  | 18.685 |
| H | 2.395  | 1.816  | 9.479  | C  | 6.441  | 5.542  | 17.067 |
| C | 3.133  | 0.111  | 10.142 | C  | 5.134  | 6.086  | 16.75  |
| H | 2.348  | -0.381 | 10.048 | C  | 3.906  | 5.786  | 17.359 |
| C | 4.269  | -0.481 | 10.641 | C  | 2.722  | 6.324  | 17.035 |
| H | 4.246  | -1.377 | 10.894 | H  | 1.935  | 6.087  | 17.471 |
| C | 5.422  | 0.222  | 10.773 | C  | 2.744  | 7.246  | 16.013 |
| H | 6.18   | -0.19  | 11.119 | C  | 3.851  | 7.591  | 15.345 |
| C | 13.32  | 8.935  | 11.626 | H  | 3.797  | 8.202  | 14.645 |
| C | 13.173 | 10.13  | 10.998 | C  | 5.094  | 7.035  | 15.694 |
| H | 12.57  | 10.222 | 10.297 | N  | 6.73   | 5.76   | 13.388 |
| C | 13.924 | 11.2   | 11.413 | N  | 8.739  | 7.472  | 13.788 |
| H | 13.815 | 12.027 | 11.002 | N  | 6.19   | 8.852  | 13.615 |
| C | 14.772 | 11.07  | 12.359 | N  | 7.439  | 6.005  | 16.23  |
| H | 15.272 | 11.805 | 12.636 | F  | 6.692  | 12.516 | 15.749 |
| C | 14.944 | 9.906  | 12.944 | F  | 8.437  | 9.965  | 19.262 |
| H | 15.611 | 9.817  | 13.586 | F  | 3.926  | 4.833  | 18.38  |
| C | 14.185 | 8.845  | 12.641 | F  | 1.572  | 7.792  | 15.701 |
| H | 14.259 | 8.057  | 13.129 | S  | 7.044  | 2.366  | 10.381 |
| C | 5.68   | 8.709  | 12.368 | S  | 12.397 | 7.508  | 11.078 |
| H | 5.666  | 7.851  | 12.009 | Ir | 6.874  | 7.349  | 14.822 |
| C | 5.19   | 9.708  | 11.606 |    |        |        |        |



**Table S11.** The x,y,z Cartesian coordinates of the complex **3** calculated using Gaussian09 at B3LYP/6-31G(d,p) level and LANL2DZ for iridium in the ground state.

|   | X        | Y        | Z        |    | X        | Y        | Z        |
|---|----------|----------|----------|----|----------|----------|----------|
| C | -0.06074 | 2.29018  | -0.61628 | H  | 1.0011   | 0.87997  | 6.55638  |
| H | 0.8751   | 2.66408  | -1.02004 | C  | 1.02038  | -0.17898 | 4.66206  |
| C | -1.18329 | 3.12036  | -0.55041 | H  | 0.55655  | -1.07217 | 5.07093  |
| H | -1.10381 | 4.1428   | -0.89913 | C  | 1.35703  | -0.14483 | 3.32339  |
| C | -2.3835  | 2.6231   | -0.05593 | H  | 1.18033  | -1.00231 | 2.69537  |
| C | -2.41018 | 1.264    | 0.39242  | C  | 1.97709  | 0.99437  | 2.75922  |
| C | -3.57751 | 0.62975  | 0.92706  | C  | 3.47634  | 1.977    | -0.44316 |
| H | -4.49497 | 1.20111  | 1.01769  | C  | 4.31018  | 2.92376  | -1.07105 |
| C | -3.56692 | -0.67531 | 1.32239  | H  | 4.65585  | 3.80468  | -0.53843 |
| H | -4.47104 | -1.12496 | 1.71117  | C  | 4.71816  | 2.72897  | -2.38357 |
| C | -2.37698 | -1.46758 | 1.24789  | H  | 5.36642  | 3.45398  | -2.86633 |
| C | -2.30072 | -2.83678 | 1.65086  | C  | 4.29794  | 1.58416  | -3.07224 |
| C | -1.06219 | -3.4643  | 1.60284  | H  | 4.62577  | 1.42096  | -4.09589 |
| H | -0.96203 | -4.50447 | 1.89327  | C  | 3.46772  | 0.64705  | -2.45672 |
| C | 0.06843  | -2.75853 | 1.17388  | H  | 3.16334  | -0.23068 | -3.01722 |
| H | 1.04428  | -3.23315 | 1.15     | C  | 3.02637  | 0.82478  | -1.13543 |
| C | -1.21307 | 0.51093  | 0.30376  | C  | 2.20462  | -2.84769 | -1.58419 |
| C | -1.18572 | -0.85259 | 0.77648  | C  | 2.02841  | -3.95764 | -2.45515 |
| C | -3.39658 | 5.19738  | -0.54881 | H  | 2.62348  | -4.84861 | -2.30068 |
| C | -3.57845 | 5.52313  | -1.89938 | C  | 1.11346  | -3.90384 | -3.4682  |
| H | -3.9597  | 4.7773   | -2.59    | H  | 0.96219  | -4.75386 | -4.12832 |
| C | -3.2766  | 6.81145  | -2.34384 | C  | 0.37253  | -2.71468 | -3.6823  |
| H | -3.41972 | 7.06717  | -3.38963 | C  | -0.53981 | -2.5835  | -4.75808 |
| C | -2.80151 | 7.76984  | -1.44547 | H  | -0.69138 | -3.43639 | -5.41439 |
| H | -2.57381 | 8.77298  | -1.79402 | C  | -1.20293 | -1.39685 | -4.97999 |
| C | -2.62824 | 7.44417  | -0.09794 | H  | -1.89431 | -1.29918 | -5.81125 |
| H | -2.26816 | 8.19213  | 0.60242  | C  | -0.95657 | -0.29751 | -4.12946 |
| C | -2.92842 | 6.15922  | 0.35644  | H  | -1.45102 | 0.65053  | -4.32162 |
| H | -2.80968 | 5.90362  | 1.40482  | C  | -0.08695 | -0.40141 | -3.06209 |
| C | -4.99109 | -3.60511 | 1.15591  | H  | 0.11539  | 0.45228  | -2.43618 |
| C | -6.27831 | -3.37242 | 1.65617  | C  | 0.5874   | -1.61487 | -2.79144 |
| H | -6.42969 | -3.22766 | 2.72201  | C  | 3.18964  | -2.83279 | -0.50872 |
| C | -7.36388 | -3.33005 | 0.77853  | C  | 4.10246  | -3.87996 | -0.27103 |
| H | -8.3621  | -3.15612 | 1.16977  | H  | 4.09104  | -4.7805  | -0.87768 |
| C | -7.16634 | -3.49935 | -0.5927  | C  | 5.04672  | -3.76264 | 0.73969  |
| H | -8.01138 | -3.45916 | -1.27359 | H  | 5.75508  | -4.56553 | 0.91991  |
| C | -5.87923 | -3.72739 | -1.08702 | C  | 5.0848   | -2.59623 | 1.51408  |
| H | -5.72228 | -3.86957 | -2.15259 | H  | 5.83091  | -2.49487 | 2.2983   |
| C | -4.79118 | -3.79654 | -0.21704 | C  | 4.17856  | -1.56022 | 1.28686  |
| H | -3.79674 | -4.00222 | -0.60151 | H  | 4.23698  | -0.66905 | 1.90261  |
| C | 3.04906  | 2.07316  | 0.94837  | C  | 3.20247  | -1.65621 | 0.28197  |
| C | 3.38083  | 3.17505  | 1.78303  | N  | -0.05982 | 1.01783  | -0.2178  |
| H | 3.9463   | 3.99959  | 1.36805  | N  | 0.02016  | -1.49029 | 0.77021  |
| C | 2.98377  | 3.1969   | 3.09007  | N  | 2.31674  | 1.03529  | 1.41638  |
| H | 3.22023  | 4.04246  | 3.73063  | N  | 1.45958  | -1.72563 | -1.72082 |
| C | 2.28118  | 2.09043  | 3.62861  | S  | -3.87575 | 3.57397  | 0.04663  |
| C | 1.90646  | 2.03407  | 4.99371  | S  | -3.64891 | -3.7781  | 2.34198  |
| H | 2.14046  | 2.88371  | 5.62967  | Ir | 1.74186  | -0.33721 | -0.11952 |
| C | 1.27912  | 0.92108  | 5.50786  |    |          |          |          |

## References

1. A. M. Brouwer, *Pure Appl. Chem.* 2011, **83**, 2213–2228.
2. V. V. Pavlishchuk and A. W. Addison, *Inorg. Chim. Acta* 2000, **298**, 97–102.
3. A. D. Becke, *J. Chem. Phys.* 1993, **98**, 5648–5652.
4. P. J. Hay and W. R. Wadt, *J. Chem. Phys.* 1985, **82**, 270–283.
5. M. Cossi and V. J. Barone, *Chem. Phys.* 2001, **115**, 4708–4717.
